# Supplementary material
Source: MDPI journal article supplement (https://www.mdpi.com/2073-4441/16/1/187)
Supplement: s1 [file s1]

# Occurrence, Distribution, and Sources of Aliphatic and Cyclic Hydrocarbons in Sediments from Two Different Lagoons along the Red Sea Coast of Saudi Arabia

Mubarak T. Al-Otaibi <sup>1,2</sup>, Ahmed I. Rushdi <sup>3</sup>, Najeeb Rasul <sup>4,5</sup>, Abdulqader Bazeyad <sup>2</sup>, Khalid F. Al-Mutlaq <sup>2</sup>, Saud S. Aloud <sup>1</sup> and Hattan A. Alharbi <sup>2,\*</sup>

- <sup>1</sup> Department of Soil Science, College of Food and Agriculture Sciences, King Saud University, P.O. Box 2460, Riyadh 11451, Saudi Arabia; mmubarakk@ksu.edu.sa (M.T.A.-O.); alouds@ksu.edu.sa (S.S.A.)
- <sup>2</sup> Department of Plant Protection, College of Food and Agriculture Sciences, King Saud University, P.O. Box 2460, Riyadh 11451, Saudi Arabia; abazeyad@ksu.edu.sa (A.B.); almutlaqk@gmail.com (K.F.A.-M.)
- <sup>3</sup> ETAL, 2951 SE Midvale Drive, Corvallis, OR 97333, USA; aimrushdi@gmail.com
- <sup>4</sup> Saudi Geological Survey, Jeddah 21514, Saudi Arabia; najeeb\_rasul@hotmail.com
- <sup>5</sup> Geological and Geophysical Research Systems, Mississauga, ON L4T 0A1, Canada
- \* Correspondence: halharbii@ksu.edu.sa

**Table S1.** Concentrations (ng/g), chemical parameters and proportions of various chemical groups in surface sediments from Al-Qahma and Al-Wajh lagoons, Red Sea coast of Saudi Arabia.

| Al-Qahma Lagoon  |                                      |      | Station # |       |       |      |       |       |       |      |       |       |       |       |      |       |      |       |      |       |
|------------------|--------------------------------------|------|-----------|-------|-------|------|-------|-------|-------|------|-------|-------|-------|-------|------|-------|------|-------|------|-------|
|                  |                                      |      | 1         | 2     | 3     | 4    | 5     | 7     | 8     | 12   | 14    | 17    | 18    | 20    | 21   | 22    | 23   | 24    | 25   | 27    |
| TEOM (ng/g)      |                                      |      | 7729      | 4054  | 6735  | 7272 | 11711 | 4523  | 5310  | 7891 | 9019  | 7181  | 3335  | 4151  | 886  | 6570  | 6670 | 5310  | 6098 | 4336  |
| Compound (ng/g)  | Composition                          | M.W. |           |       |       |      |       |       |       |      |       |       |       |       |      |       |      |       |      |       |
| n-Alkanes        |                                      |      |           |       |       |      |       |       |       |      |       |       |       |       |      |       |      |       |      |       |
| Pentadecane      | C <sub>15</sub> H <sub>32</sub>      | 212  | 2.4       | 0.0   | 1.8   | 0.4  | 1.5   | 0.6   | 0.8   | 1.2  | 0.1   | 1.0   | 1.3   | 0.0   | 0.0  | 0.6   | 0.6  | 0.3   | 0.5  | 0.7   |
| Hexadecane       | C <sub>16</sub> H <sub>34</sub>      | 226  | 16.8      | 11.6  | 27.2  | 1.2  | 4.5   | 3.3   | 1.5   | 2.5  | 1.7   | 4.9   | 19.7  | 0.8   | 0.6  | 2.5   | 4.0  | 2.9   | 0.8  | 6.0   |
| Heptadecane      | C <sub>17</sub> H <sub>36</sub>      | 240  | 54.9      | 34.9  | 79.5  | 13.1 | 48.0  | 26.7  | 17.5  | 11.8 | 23.5  | 28.0  | 1.9   | 6.2   | 2.7  | 9.2   | 16.0 | 18.6  | 6.1  | 26.0  |
| Pristane         | C <sub>19</sub> H <sub>40</sub> (Pr) | 268  | 1.5       | 2.5   | 2.7   | 0.4  | 1.6   | 1.0   | 0.7   | 0.5  | 0.9   | 1.0   | 25.0  | 0.3   | 0.5  | 0.2   | 0.5  | 0.6   | 0.4  | 0.8   |
| Octadecane       | C <sub>18</sub> H <sub>38</sub>      | 256  | 49.4      | 35.7  | 89.3  | 4.4  | 16.2  | 14.0  | 5.7   | 6.9  | 17.7  | 22.4  | 3.8   | 8.0   | 3.9  | 8.0   | 8.3  | 19.5  | 7.3  | 26.1  |
| Phytane          | C <sub>20</sub> H <sub>42</sub> (Ph) | 282  | 16.4      | 11.2  | 32.1  | 0.3  | 1.1   | 2.3   | 0.6   | 1.4  | 2.7   | 12.5  | 11.2  | 1.5   | 0.6  | 1.3   | 3.9  | 2.9   | 1.0  | 2.5   |
| Nonadecane       | C <sub>19</sub> H <sub>40</sub>      | 268  | 9.0       | 2.1   | 111.5 | 0.2  | 0.9   | 2.2   | 1.5   | 4.5  | 11.1  | 3.0   | 66.6  | 4.8   | 0.9  | 9.0   | 2.6  | 5.4   | 0.6  | 0.2   |
| Eicosane         | C <sub>20</sub> H <sub>42</sub>      | 282  | 27.2      | 22.2  | 61.3  | 5.8  | 21.1  | 13.7  | 7.9   | 12.6 | 20.5  | 28.6  | 37.7  | 10.8  | 9.5  | 17.2  | 13.3 | 25.4  | 17.3 | 18.5  |
| Heneicosane      | C <sub>21</sub> H <sub>44</sub>      | 296  | 14.2      | 12.9  | 40.3  | 2.0  | 7.2   | 11.6  | 4.7   | 5.0  | 9.4   | 12.2  | 50.8  | 6.8   | 3.8  | 7.6   | 3.5  | 12.2  | 8.5  | 13.6  |
| Docosane         | C <sub>22</sub> H <sub>46</sub>      | 310  | 14.3      | 11.4  | 46.2  | 3.1  | 11.3  | 11.2  | 5.9   | 7.7  | 10.4  | 15.1  | 57.7  | 9.4   | 7.3  | 13.0  | 3.2  | 17.2  | 8.6  | 17.3  |
| Tricosane        | C <sub>23</sub> H <sub>48</sub>      | 324  | 13.6      | 9.8   | 60.2  | 3.3  | 12.0  | 9.0   | 6.6   | 5.9  | 12.1  | 35.9  | 67.8  | 10.7  | 4.6  | 13.1  | 2.6  | 15.4  | 6.9  | 26.5  |
| Tetracosane      | C <sub>24</sub> H <sub>50</sub>      | 338  | 14.2      | 7.1   | 37.8  | 3.3  | 12.0  | 7.0   | 7.3   | 6.4  | 12.6  | 10.4  | 83.4  | 10.2  | 3.9  | 16.5  | 2.0  | 14.9  | 6.7  | 19.1  |
| Pentacosane      | C <sub>25</sub> H <sub>52</sub>      | 352  | 16.0      | 7.0   | 74.6  | 3.7  | 13.5  | 4.9   | 8.6   | 4.8  | 14.5  | 46.2  | 76.5  | 10.5  | 1.9  | 15.2  | 8.0  | 15.5  | 8.2  | 36.3  |
| Hexacosane       | C <sub>26</sub> H <sub>54</sub>      | 366  | 15.6      | 4.6   | 22.8  | 3.3  | 12.2  | 3.5   | 8.5   | 2.9  | 13.5  | 7.5   | 74.7  | 10.6  | 2.1  | 16.2  | 1.4  | 15.9  | 4.9  | 16.4  |
| Heptacosane      | C <sub>27</sub> H <sub>56</sub>      | 380  | 22.6      | 9.3   | 75.8  | 4.2  | 15.4  | 4.9   | 7.8   | 4.2  | 13.9  | 43.6  | 53.8  | 10.4  | 1.4  | 13.2  | 2.6  | 15.4  | 4.0  | 39.5  |
| Octacosane       | C <sub>28</sub> H <sub>58</sub>      | 394  | 11.6      | 3.1   | 13.8  | 2.4  | 8.8   | 2.5   | 5.4   | 1.9  | 8.0   | 4.1   | 41.9  | 8.1   | 1.5  | 10.8  | 1.2  | 11.3  | 2.2  | 11.8  |
| Nonacosane       | C <sub>29</sub> H <sub>60</sub>      | 408  | 14.8      | 7.4   | 37.3  | 1.8  | 6.8   | 3.2   | 4.1   | 3.5  | 8.6   | 23.6  | 33.8  | 6.0   | 0.9  | 7.5   | 2.4  | 9.6   | 2.4  | 21.0  |
| Triacontane      | C <sub>30</sub> H <sub>62</sub>      | 422  | 7.2       | 2.1   | 10.1  | 1.0  | 3.5   | 1.5   | 2.3   | 0.9  | 4.0   | 2.6   | 24.5  | 3.2   | 0.3  | 3.7   | 0.5  | 4.9   | 0.5  | 5.5   |
| Hentriacontane   | C <sub>31</sub> H <sub>64</sub>      | 436  | 12.0      | 7.4   | 41.8  | 1.1  | 3.9   | 3.3   | 2.1   | 2.3  | 5.0   | 17.8  | 3.4   | 2.3   | 0.7  | 3.2   | 2.7  | 4.0   | 0.5  | 14.2  |
| Dotriacontane    | C <sub>32</sub> H <sub>66</sub>      | 450  | 3.8       | 1.1   | 4.9   | 0.2  | 0.8   | 0.5   | 0.9   | 0.5  | 1.3   | 1.0   | 2.9   | 0.7   | 0.1  | 0.6   | 0.3  | 1.8   | 0.6  | 2.4   |
| Tritriacontane   | C <sub>33</sub> H <sub>68</sub>      | 464  | 4.9       | 3.3   | 23.0  | 0.0  | 0.1   | 0.6   | 0.3   | 1.4  | 1.4   | 49.3  | 0.0   | 0.3   | 0.1  | 0.4   | 1.2  | 0.5   | 0.1  | 7.4   |
| Tettraiacontane  | C <sub>34</sub> H <sub>70</sub>      | 478  | 0.0       | 0.0   | 0.0   | 0.0  | 0.0   | 0.0   | 0.0   | 0.0  | 0.0   | 0.0   | 0.0   | 0.0   | 0.0  | 0.0   | 0.0  | 0.0   | 0.0  | 0.0   |
| Pentatriacontane | C <sub>35</sub> H <sub>72</sub>      | 492  | 0.0       | 0.0   | 0.0   | 0.0  | 0.0   | 0.0   | 0.0   | 0.0  | 0.0   | 0.0   | 0.0   | 0.0   | 0.0  | 0.0   | 0.0  | 0.0   | 0.0  | 0.0   |
| Hexatriacontane  | C <sub>36</sub> H <sub>74</sub>      | 506  | 0.0       | 0.0   | 0.0   | 0.0  | 0.0   | 0.0   | 0.0   | 0.0  | 0.0   | 0.0   | 0.0   | 0.0   | 0.0  | 0.0   | 0.0  | 0.0   | 0.0  | 0.0   |
| Heptatriacontane | C <sub>37</sub> H <sub>76</sub>      | 520  | 0.0       | 0.0   | 0.0   | 0.0  | 0.0   | 0.0   | 0.0   | 0.0  | 0.0   | 0.0   | 0.0   | 0.0   | 0.0  | 0.0   | 0.0  | 0.0   | 0.0  | 0.0   |
| Total            |                                      |      | 342.4     | 206.6 | 894.0 | 55.2 | 202.4 | 127.5 | 100.6 | 88.7 | 193.0 | 370.5 | 738.5 | 121.6 | 47.2 | 169.2 | 80.8 | 214.0 | 88.3 | 311.8 |

|                                      |                                 |     |       |       |       |       |       |       |       |       |       |       |       |       |       |       |       |       |       |       |
|--------------------------------------|---------------------------------|-----|-------|-------|-------|-------|-------|-------|-------|-------|-------|-------|-------|-------|-------|-------|-------|-------|-------|-------|
| CPI(o/e)                             |                                 |     | 1.0   | 1.0   | 1.7   | 1.2   | 1.2   | 1.2   | 1.2   | 1.1   | 1.1   | 2.7   | 1.0   | 0.9   | 0.6   | 0.9   | 1.2   | 0.9   | 0.8   | 1.5   |
| LMW/HMW                              |                                 |     | 2.0   | 3.3   | 1.8   | 2.1   | 2.1   | 4.0   | 1.5   | 2.8   | 1.7   | 0.8   | 1.2   | 1.3   | 4.2   | 1.4   | 2.7   | 1.7   | 2.7   | 1.0   |
| TAR                                  |                                 |     | 0.68  | 0.55  | 0.76  | 0.45  | 0.45  | 0.29  | 0.59  | 0.50  | 0.66  | 3.04  | 0.76  | 1.06  | 0.42  | 0.92  | 0.39  | 0.81  | 0.44  | 2.03  |
| Wax n-alkanes                        |                                 |     |       |       |       |       |       |       |       |       |       |       |       |       |       |       |       |       |       |       |
| Total                                |                                 |     | 23.9  | 18.8  | 137.7 | 2.0   | 7.3   | 5.7   | 2.0   | 6.6   | 8.9   | 122.9 | 57.9  | 1.9   | 2.1   | 14.6  | 6.2   | 4.4   | 1.5   | 54.3  |
| %                                    |                                 |     | 7.0%  | 9.1%  | 15.4% | 3.6%  | 3.6%  | 4.5%  | 2.0%  | 7.4%  | 4.6%  | 33.2% | 7.8%  | 1.6%  | 4.4%  | 8.7%  | 7.7%  | 2.1%  | 1.7%  | 17.4% |
| Algal n-Alkanes                      |                                 |     |       |       |       |       |       |       |       |       |       |       |       |       |       |       |       |       |       |       |
| Total                                |                                 |     | 47.3  | 26.3  | 174.9 | 12.9  | 47.3  | 32.5  | 20.9  | 17.8  | 34.3  | 30.6  | 108.7 | 13.3  | 5.2   | 21.2  | 16.6  | 25.3  | 11.8  | 24.4  |
| %                                    |                                 |     | 13.8% | 12.7% | 19.6% | 23.4% | 23.4% | 25.5% | 20.8% | 20.1% | 17.8% | 8.2%  | 14.7% | 11.0% | 11.0% | 12.5% | 20.5% | 11.8% | 13.3% | 7.8%  |
| Bacterial n-Alkanes                  |                                 |     |       |       |       |       |       |       |       |       |       |       |       |       |       |       |       |       |       |       |
| Total                                |                                 |     | 49.9  | 43.4  | 177.7 | 11.4  | 41.8  | 31.0  | 15.1  | 22.0  | 39.9  | 55.9  | 61.3  | 19.7  | 14.0  | 27.7  | 25.6  | 47.8  | 25.4  | 50.7  |
| %                                    |                                 |     | 14.6% | 21.0% | 19.9% | 20.7% | 20.7% | 24.3% | 15.0% | 24.8% | 20.7% | 15.1% | 8.3%  | 16.2% | 29.6% | 16.4% | 31.7% | 22.3% | 28.7% | 16.3% |
| Petroleum n-alkanes                  |                                 |     | 221.3 | 118.2 | 403.7 | 28.9  | 106.0 | 58.3  | 62.6  | 42.4  | 109.9 | 161.2 | 510.7 | 86.7  | 26.0  | 105.7 | 32.4  | 136.5 | 49.6  | 182.4 |
| %                                    |                                 |     | 64.6% | 57.2% | 45.2% | 52.4% | 52.4% | 45.7% | 62.2% | 47.7% | 56.9% | 43.5% | 69.1% | 71.3% | 55.1% | 62.4% | 40.1% | 63.8% | 56.2% | 58.5% |
| Hopanes                              |                                 |     |       |       |       |       |       |       |       |       |       |       |       |       |       |       |       |       |       |       |
| Trisnorneohopane                     | C <sub>27</sub> H <sub>46</sub> | 370 | 0.0   | 0.0   | 7.1   | 0.0   | 0.0   | 0.0   | 0.0   | 0.0   | 0.0   | 0.0   | 0.0   | 0.0   | 0.0   | 1.0   | 0.0   | 0.0   | 0.0   | 0.0   |
| 17a(H)-Trisnorhopane                 | C <sub>27</sub> H <sub>46</sub> | 370 | 0.0   | 0.0   | 3.6   | 0.0   | 0.0   | 0.0   | 0.0   | 0.0   | 0.0   | 0.0   | 0.0   | 0.0   | 0.0   | 0.2   | 0.0   | 0.0   | 0.0   | 0.0   |
| 17a(H),21b(H)-Norhopane              | C <sub>29</sub> H <sub>50</sub> | 398 | 0.0   | 0.0   | 19.0  | 0.0   | 0.0   | 0.0   | 0.0   | 0.0   | 0.0   | 0.0   | 0.0   | 0.0   | 0.5   | 7.4   | 0.0   | 0.0   | 0.0   | 0.0   |
| 17a(H),21b(H)-Hopane                 | C <sub>30</sub> H <sub>52</sub> | 412 | 0.0   | 0.0   | 21.0  | 0.0   | 0.0   | 0.0   | 0.0   | 0.0   | 0.0   | 0.0   | 0.0   | 0.0   | 0.2   | 4.9   | 0.0   | 0.0   | 0.0   | 0.0   |
| 17a(H),21b(H)-22S-Homohopane         | C <sub>31</sub> H <sub>54</sub> | 426 | 0.0   | 0.0   | 6.6   | 0.0   | 0.0   | 0.0   | 0.0   | 0.0   | 0.0   | 0.0   | 0.0   | 0.0   | 0.1   | 2.8   | 0.0   | 0.0   | 0.0   | 0.0   |
| 17a(H),21b(H)-22R-Homohopane         | C <sub>31</sub> H <sub>54</sub> | 426 | 0.0   | 0.0   | 2.2   | 0.0   | 0.0   | 0.0   | 0.0   | 0.0   | 0.0   | 0.0   | 0.0   | 0.0   | 0.1   | 1.8   | 0.0   | 0.0   | 0.0   | 0.0   |
| Gammacerane                          | C <sub>30</sub> H <sub>52</sub> | 412 | 0.0   | 0.0   | 2.7   | 0.0   | 0.0   | 0.0   | 0.0   | 0.0   | 0.0   | 0.0   | 0.0   | 0.0   | 0.1   | 0.2   | 0.0   | 0.0   | 0.0   | 0.0   |
| 17a(H),21b(H)-22S-Bishomohopane      | C <sub>32</sub> H <sub>56</sub> | 440 | 0.0   | 0.0   | 10.4  | 0.0   | 0.0   | 0.0   | 0.0   | 0.0   | 0.0   | 0.0   | 0.0   | 0.0   | 0.0   | 0.9   | 0.0   | 0.0   | 0.0   | 0.0   |
| 17a(H),21b(H)-22R-Bishomohopane      | C <sub>32</sub> H <sub>56</sub> | 440 | 0.0   | 0.0   | 8.1   | 0.0   | 0.0   | 0.0   | 0.0   | 0.0   | 0.0   | 0.0   | 0.0   | 0.0   | 0.0   | 0.5   | 0.0   | 0.0   | 0.0   | 0.0   |
| 17a(H),21b(H)-22S-Trishomohopane     | C <sub>33</sub> H <sub>58</sub> | 454 | 0.0   | 0.0   | 1.8   | 0.0   | 0.0   | 0.0   | 0.0   | 0.0   | 0.0   | 0.0   | 0.0   | 0.0   | 0.0   | 0.0   | 0.0   | 0.0   | 0.0   | 0.0   |
| 17a(H),21b(H)-22R-Trishomohopane     | C <sub>33</sub> H <sub>58</sub> | 454 | 0.0   | 0.0   | 0.4   | 0.0   | 0.0   | 0.0   | 0.0   | 0.0   | 0.0   | 0.0   | 0.0   | 0.0   | 0.0   | 0.0   | 0.0   | 0.0   | 0.0   | 0.0   |
| 17a(H),21b(H)-22S-Tetrakishomohopane | C <sub>34</sub> H <sub>60</sub> | 468 | 0.0   | 0.0   | 0.0   | 0.0   | 0.0   | 0.0   | 0.0   | 0.0   | 0.0   | 0.0   | 0.0   | 0.0   | 0.0   | 0.0   | 0.0   | 0.0   | 0.0   | 0.0   |
| 17a(H),21b(H)-22R-Tetrakishomohopane | C <sub>34</sub> H <sub>60</sub> | 468 | 0.0   | 0.0   | 0.0   | 0.0   | 0.0   | 0.0   | 0.0   | 0.0   | 0.0   | 0.0   | 0.0   | 0.0   | 0.0   | 0.0   | 0.0   | 0.0   | 0.0   | 0.0   |
| 17a(H),21b(H)-22S-Pentakishomohopane | C <sub>35</sub> H <sub>62</sub> | 482 | 0.0   | 0.0   | 0.0   | 0.0   | 0.0   | 0.0   | 0.0   | 0.0   | 0.0   | 0.0   | 0.0   | 0.0   | 0.0   | 0.0   | 0.0   | 0.0   | 0.0   | 0.0   |
| 17a(H),21b(H)-22R-Pentakishomohopane | C <sub>35</sub> H <sub>62</sub> | 482 | 0.0   | 0.0   | 0.0   | 0.0   | 0.0   | 0.0   | 0.0   | 0.0   | 0.0   | 0.0   | 0.0   | 0.0   | 0.0   | 0.0   | 0.0   | 0.0   | 0.0   | 0.0   |
| Total                                |                                 |     | 0.0   | 0.0   | 82.8  | 0.0   | 0.0   | 0.0   | 0.0   | 0.0   | 0.0   | 0.0   | 0.0   | 0.0   | 1.0   | 19.7  | 0.0   | 0.0   | 0.0   | 0.0   |
| C <sub>31</sub> S/(R+S)              |                                 |     | ND    | ND    | 0.75  | ND    | 0.70  | 0.61  | ND    | ND    | ND    | ND    |

|                                   |                                                |     |       |      |       |      |       |      |      |      |       |       |      |      |      |      |      |       |      |      |
|-----------------------------------|------------------------------------------------|-----|-------|------|-------|------|-------|------|------|------|-------|-------|------|------|------|------|------|-------|------|------|
| C <sub>32</sub> S/(R+S)           |                                                |     | ND    | ND   | 0.56  | ND   | ND    | ND   | ND   | ND   | ND    | ND    | ND   | ND   | 1.00 | 0.65 | ND   | ND    | ND   | ND   |
| Steranes                          |                                                |     |       |      |       |      |       |      |      |      |       |       |      |      |      |      |      |       |      |      |
| 13b,17a-20S-Cholestane Diasterane | C <sub>27</sub> H <sub>48</sub>                | 372 | 0.0   | 0.0  | 0.0   | 0.0  | 0.0   | 0.0  | 0.0  | 0.0  | 0.0   | 0.0   | 0.0  | 0.0  | 0.0  | 0.0  | 0.0  | 0.0   | 0.0  | 0.0  |
| 13b,17a-20R-Cholestane Diasterane | C <sub>27</sub> H <sub>48</sub>                | 372 | 0.0   | 0.0  | 0.0   | 0.0  | 0.0   | 0.0  | 0.0  | 0.0  | 0.0   | 0.0   | 0.0  | 0.0  | 0.0  | 0.0  | 0.0  | 0.0   | 0.0  | 0.0  |
| 13a,17b-20S-Cholestane Diasterane | C <sub>27</sub> H <sub>48</sub>                | 372 | 0.0   | 0.0  | 0.0   | 0.0  | 0.0   | 0.0  | 0.0  | 0.0  | 0.0   | 0.0   | 0.0  | 0.0  | 0.0  | 0.0  | 0.0  | 0.0   | 0.0  | 0.0  |
| 13a,17b-20R-Cholestane Diasterane | C <sub>27</sub> H <sub>48</sub>                | 372 | 0.0   | 0.0  | 0.0   | 0.0  | 0.0   | 0.0  | 0.0  | 0.0  | 0.0   | 0.0   | 0.0  | 0.0  | 0.0  | 0.0  | 0.0  | 0.0   | 0.0  | 0.0  |
| 14a,17ba-20S-Cholestane           | C <sub>27</sub> H <sub>48</sub>                | 372 | 0.0   | 0.0  | 0.0   | 0.0  | 0.0   | 0.0  | 0.0  | 0.0  | 0.0   | 0.0   | 0.0  | 0.0  | 0.0  | 0.0  | 0.0  | 0.0   | 0.0  | 0.0  |
| 14b,17b-20R-Cholestane            | C <sub>27</sub> H <sub>48</sub>                | 372 | 0.0   | 0.0  | 0.0   | 0.0  | 0.0   | 0.0  | 0.0  | 0.0  | 0.0   | 0.0   | 0.0  | 0.0  | 0.0  | 0.0  | 0.0  | 0.0   | 0.0  | 0.0  |
| 14b,17b-20S-Cholestane            | C <sub>27</sub> H <sub>48</sub>                | 372 | 0.0   | 0.0  | 0.0   | 0.0  | 0.0   | 0.0  | 0.0  | 0.0  | 0.0   | 0.0   | 0.0  | 0.0  | 0.0  | 0.0  | 0.0  | 0.0   | 0.0  | 0.0  |
| 14a,17ba-20R-Cholestane           | C <sub>27</sub> H <sub>48</sub>                | 372 | 0.0   | 0.0  | 0.0   | 0.0  | 0.0   | 0.0  | 0.0  | 0.0  | 0.0   | 0.0   | 0.0  | 0.0  | 0.0  | 0.0  | 0.0  | 0.0   | 0.0  | 0.0  |
| 14a,17ba-20S-Ergostane            | C <sub>28</sub> H <sub>50</sub>                | 386 | 0.0   | 0.0  | 0.0   | 0.0  | 0.0   | 0.0  | 0.0  | 0.0  | 0.0   | 0.0   | 0.0  | 0.0  | 0.0  | 0.0  | 0.0  | 0.0   | 0.0  | 0.0  |
| 14b,17b-20R-Ergostane             | C <sub>28</sub> H <sub>50</sub>                | 386 | 0.0   | 0.0  | 0.0   | 0.0  | 0.0   | 0.0  | 0.0  | 0.0  | 0.0   | 0.0   | 0.0  | 0.0  | 0.0  | 0.0  | 0.0  | 0.0   | 0.0  | 0.0  |
| 14b,17b-20S-Ergostane             | C <sub>28</sub> H <sub>50</sub>                | 386 | 0.0   | 0.0  | 0.0   | 0.0  | 0.0   | 0.0  | 0.0  | 0.0  | 0.0   | 0.0   | 0.0  | 0.0  | 0.0  | 0.0  | 0.0  | 0.0   | 0.0  | 0.0  |
| 14a,17ba-20R-Ergostane            | C <sub>28</sub> H <sub>50</sub>                | 386 | 0.0   | 0.0  | 0.0   | 0.0  | 0.0   | 0.0  | 0.0  | 0.0  | 0.0   | 0.0   | 0.0  | 0.0  | 0.0  | 0.0  | 0.0  | 0.0   | 0.0  | 0.0  |
| 14a,17ba-20S-Stigmastane          | C <sub>29</sub> H <sub>52</sub>                | 400 | 0.0   | 0.0  | 0.0   | 0.0  | 0.0   | 0.0  | 0.0  | 0.0  | 0.0   | 0.0   | 0.0  | 0.0  | 0.0  | 0.0  | 0.0  | 0.0   | 0.0  | 0.0  |
| 14b,17b-20R-Stigmastane           | C <sub>29</sub> H <sub>52</sub>                | 400 | 0.0   | 0.0  | 0.0   | 0.0  | 0.0   | 0.0  | 0.0  | 0.0  | 0.0   | 0.0   | 0.0  | 0.0  | 0.0  | 0.0  | 0.0  | 0.0   | 0.0  | 0.0  |
| 14b,17b-20S-Stigmastane           | C <sub>29</sub> H <sub>52</sub>                | 400 | 0.0   | 0.0  | 0.0   | 0.0  | 0.0   | 0.0  | 0.0  | 0.0  | 0.0   | 0.0   | 0.0  | 0.0  | 0.0  | 0.0  | 0.0  | 0.0   | 0.0  | 0.0  |
| 14a,17ba-20R-Stigmastane          | C <sub>29</sub> H <sub>52</sub>                | 400 | 0.0   | 0.0  | 0.0   | 0.0  | 0.0   | 0.0  | 0.0  | 0.0  | 0.0   | 0.0   | 0.0  | 0.0  | 0.0  | 0.0  | 0.0  | 0.0   | 0.0  | 0.0  |
| Total                             |                                                |     | 0.0   | 0.0  | 0.0   | 0.0  | 0.0   | 0.0  | 0.0  | 0.0  | 0.0   | 0.0   | 0.0  | 0.0  | 0.0  | 0.0  | 0.0  | 0.0   | 0.0  | 0.0  |
| PAHs                              |                                                |     |       |      |       |      |       |      |      |      |       |       |      |      |      |      |      |       |      |      |
| Phenanthrene                      | C <sub>14</sub> H <sub>10</sub>                | 178 | 0.4   | 0.3  | 0.3   | 0.0  | 0.1   | 0.0  | 0.1  | 0.2  | 0.8   | 0.4   | 0.0  | 0.2  | 0.0  | 0.2  | 0.3  | 1.1   | 0.3  | 0.6  |
| Anthracene                        | C <sub>14</sub> H <sub>10</sub>                | 178 | 2.0   | 1.9  | 1.1   | 0.7  | 1.1   | 0.4  | 3.9  | 5.9  | 11.0  | 5.1   | 4.0  | 8.2  | 1.0  | 8.0  | 6.0  | 10.2  | 10.5 | 6.4  |
| Benzo[k]fluoranthene              | C <sub>20</sub> H <sub>12</sub>                | 252 | 0.0   | 28.0 | 29.0  | 17.5 | 29.3  | 17.2 | 0.0  | 0.0  | 20.7  | 15.8  | 6.3  | 26.6 | 1.6  | 16.4 | 21.3 | 13.8  | 14.0 | 29.5 |
| Benzo[b]fluoranthene              | C <sub>20</sub> H <sub>12</sub>                | 252 | 0.0   | 23.2 | 22.6  | 10.5 | 19.7  | 13.4 | 0.0  | 10.3 | 14.6  | 11.3  | 4.6  | 19.7 | 1.3  | 11.2 | 15.4 | 9.6   | 10.2 | 22.1 |
| Total                             |                                                |     | 2.4   | 53.3 | 52.9  | 28.7 | 50.2  | 31.1 | 4.0  | 16.4 | 47.1  | 32.6  | 15.0 | 54.7 | 3.8  | 35.8 | 43.1 | 34.7  | 35.0 | 58.5 |
| Ant/(Ant+Phe)                     |                                                |     | 0.8   | 0.9  | 0.8   | 1.0  | 0.9   | 1.0  | 1.0  | 1.0  | 0.9   | 0.9   | 1.0  | 1.0  | 1.0  | 1.0  | 1.0  | 0.9   | 1.0  | 0.9  |
| Methyl n-Alkanoates               |                                                |     |       |      |       |      |       |      |      |      |       |       |      |      |      |      |      |       |      |      |
| Methyl hexadecanoate              | C <sub>17</sub> H <sub>34</sub> O <sub>2</sub> | 270 | 107.4 | 72.2 | 102.4 | 64.0 | 113.6 | 58.8 | 41.4 | 60.8 | 94.7  | 98.4  | 32.7 | 46.1 | 30.6 | 59.8 | 70.0 | 95.6  | 48.2 | 77.2 |
| Methyl octadecenoate              | C <sub>19</sub> H <sub>38</sub> O <sub>2</sub> | 298 | 12.7  | 6.2  | 8.8   | 11.0 | 15.6  | 4.6  | 8.0  | 13.6 | 14.5  | 10.5  | 5.4  | 3.5  | 7.5  | 8.0  | 9.4  | 9.8   | 10.7 | 5.4  |
| Total                             |                                                |     | 120.1 | 78.4 | 111.2 | 74.9 | 129.2 | 63.4 | 49.4 | 74.4 | 109.2 | 108.9 | 38.1 | 49.6 | 38.0 | 67.8 | 79.4 | 105.4 | 58.9 | 82.6 |
| Total FA                          |                                                |     |       |      |       |      |       |      |      |      |       |       |      |      |      |      |      |       |      |      |
| Nonanoic acid                     | C <sub>9</sub> H <sub>18</sub> O <sub>2</sub>  | 158 | 67.9  | 27.5 | 5.6   | 37.0 | 17.5  | 2.7  | 36.9 | 65.2 | 30.3  | 4.9   | 4.8  | 1.9  | 0.5  | 4.7  | 34.2 | 20.1  | 56.2 | 3.8  |
| Decanoic acid                     | C <sub>10</sub> H <sub>20</sub> O <sub>2</sub> | 172 | 34.9  | 2.4  | 2.7   | 17.9 | 7.7   | 1.2  | 17.0 | 33.1 | 14.9  | 2.0   | 1.9  | 0.8  | 0.0  | 1.7  | 12.5 | 7.7   | 18.1 | 0.6  |

|                     |                                                |     |               |               |              |               |              |              |               |               |               |              |              |              |             |              |              |              |              |              |
|---------------------|------------------------------------------------|-----|---------------|---------------|--------------|---------------|--------------|--------------|---------------|---------------|---------------|--------------|--------------|--------------|-------------|--------------|--------------|--------------|--------------|--------------|
| Undecanoic acid     | C <sub>11</sub> H <sub>22</sub> O <sub>2</sub> | 186 | 20.1          | 0.0           | 1.9          | 8.5           | 3.6          | 0.6          | 9.0           | 20.9          | 8.2           | 0.4          | 0.9          | 0.4          | 0.0         | 0.7          | 5.8          | 3.7          | 4.8          | 0.0          |
| Dodecanoic acid     | C <sub>12</sub> H <sub>24</sub> O <sub>2</sub> | 200 | 45.5          | 23.7          | 3.7          | 15.5          | 7.1          | 1.9          | 18.1          | 45.2          | 18.3          | 1.7          | 1.9          | 1.1          | 0.0         | 1.8          | 13.6         | 8.4          | 10.0         | 1.7          |
| Tridecanoic acid    | C <sub>13</sub> H <sub>26</sub> O <sub>2</sub> | 214 | 21.9          | 77.3          | 4.8          | 8.0           | 3.7          | 1.7          | 10.3          | 25.0          | 10.2          | 1.9          | 1.1          | 0.9          | 0.0         | 1.4          | 6.4          | 4.4          | 7.4          | 3.1          |
| Tetradecanoic acid  | C <sub>14</sub> H <sub>28</sub> O <sub>2</sub> | 228 | 114.1         | 70.1          | 9.9          | 39.9          | 22.5         | 7.3          | 55.0          | 130.4         | 60.0          | 4.9          | 5.2          | 3.0          | 0.0         | 4.6          | 37.8         | 23.0         | 28.5         | 4.8          |
| Pentadecanoic acid  | C <sub>15</sub> H <sub>30</sub> O <sub>2</sub> | 242 | 69.1          | 38.2          | 5.0          | 24.9          | 10.1         | 5.0          | 36.0          | 93.6          | 36.7          | 1.8          | 3.3          | 2.2          | 0.0         | 2.5          | 23.5         | 12.4         | 13.8         | 1.5          |
| Hexadecanoic acid   | C <sub>16</sub> H <sub>32</sub> O <sub>2</sub> | 256 | 1127.7        | 388.4         | 189.2        | 524.3         | 297.5        | 95.0         | 593.1         | 1424.3        | 708.0         | 124.2        | 108.4        | 75.6         | 33.6        | 109.7        | 516.9        | 340.9        | 329.9        | 104.0        |
| Heptadecanoic acid  | C <sub>17</sub> H <sub>34</sub> O <sub>2</sub> | 270 | 27.1          | 4.7           | 1.5          | 8.6           | 3.0          | 0.4          | 13.5          | 39.0          | 14.0          | 0.4          | 1.3          | 0.6          | 0.0         | 0.7          | 8.7          | 4.5          | 7.3          | 0.3          |
| Octadecanoic acid   | C <sub>18</sub> H <sub>36</sub> O <sub>2</sub> | 284 | 766.6         | 181.6         | 61.0         | 331.9         | 126.8        | 16.1         | 406.4         | 1081.4        | 451.0         | 24.0         | 59.8         | 22.4         | 8.8         | 37.0         | 318.1        | 173.0        | 180.3        | 19.8         |
| Nonadecanoic acid   | C <sub>19</sub> H <sub>38</sub> O <sub>2</sub> | 298 | 7.2           | 11.0          | 4.7          | 0.2           | 0.4          | 3.1          | 0.6           | 3.3           | 0.6           | 0.6          | 0.0          | 0.1          | 0.3         | 0.1          | 0.1          | 0.1          | 0.9          | 0.8          |
| Eicosanoic acid     | C <sub>20</sub> H <sub>40</sub> O <sub>2</sub> | 312 | 8.1           | 14.0          | 0.4          | 2.3           | 0.6          | 0.9          | 4.0           | 11.9          | 4.5           | 0.3          | 0.5          | 0.2          | 0.2         | 0.2          | 2.8          | 1.1          | 0.3          | 0.2          |
| <b>Total</b>        |                                                |     | <b>2310.3</b> | <b>838.9</b>  | <b>290.4</b> | <b>1018.9</b> | <b>500.4</b> | <b>135.9</b> | <b>1200.0</b> | <b>2973.2</b> | <b>1356.7</b> | <b>167.1</b> | <b>189.0</b> | <b>109.2</b> | <b>43.3</b> | <b>165.1</b> | <b>980.6</b> | <b>599.3</b> | <b>657.5</b> | <b>140.5</b> |
| CPI(e/o)            |                                                |     | 9.8           | 4.3           | 11.4         | 10.7          | 12.1         | 9.1          | 10.3          | 11.0          | 12.6          | 15.7         | 15.7         | 16.7         | 57.7        | 15.5         | 11.4         | 12.2         | 6.3          | 13.8         |
| <b>Wax FA</b>       |                                                |     | <b>0.00</b>   | <b>0.00</b>   | <b>0.00</b>  | <b>0.00</b>   | <b>0.00</b>  | <b>0.00</b>  | <b>0.00</b>   | <b>0.00</b>   | <b>0.00</b>   | <b>0.00</b>  | <b>0.00</b>  | <b>0.00</b>  | <b>0.00</b> | <b>0.00</b>  | <b>0.00</b>  | <b>0.00</b>  | <b>0.00</b>  | <b>0.00</b>  |
| <b>Algal FA</b>     |                                                |     |               |               |              |               |              |              |               |               |               |              |              |              |             |              |              |              |              |              |
| <b>Total</b>        |                                                |     | <b>2097.0</b> | <b>680.2</b>  | <b>267.0</b> | <b>931.8</b>  | <b>462.1</b> | <b>122.5</b> | <b>1093.7</b> | <b>2726.3</b> | <b>1256.7</b> | <b>157.1</b> | <b>177.7</b> | <b>103.0</b> | <b>42.6</b> | <b>155.1</b> | <b>901.7</b> | <b>554.0</b> | <b>567.1</b> | <b>131.0</b> |
| %                   |                                                |     | 90.8%         | 81.1%         | 91.9%        | 91.4%         | 92.3%        | 90.1%        | 91.1%         | 91.7%         | 92.6%         | 94.0%        | 94.0%        | 94.3%        | 98.3%       | 93.9%        | 92.0%        | 92.4%        | 86.2%        | 93.2%        |
| <b>Microbial FA</b> |                                                |     |               |               |              |               |              |              |               |               |               |              |              |              |             |              |              |              |              |              |
| <b>Total</b>        |                                                |     | <b>213.32</b> | <b>158.69</b> | <b>23.40</b> | <b>87.12</b>  | <b>38.31</b> | <b>13.42</b> | <b>106.30</b> | <b>246.98</b> | <b>100.00</b> | <b>10.00</b> | <b>11.33</b> | <b>6.17</b>  | <b>0.74</b> | <b>10.01</b> | <b>78.86</b> | <b>45.26</b> | <b>90.41</b> | <b>9.49</b>  |
| %                   |                                                |     | 9.2%          | 18.9%         | 8.1%         | 8.6%          | 7.7%         | 9.9%         | 8.9%          | 8.3%          | 7.4%          | 6.0%         | 6.0%         | 5.7%         | 1.7%        | 6.1%         | 8.0%         | 7.6%         | 13.8%        | 6.8%         |
| <b>n-Alkanols</b>   |                                                |     |               |               |              |               |              |              |               |               |               |              |              |              |             |              |              |              |              |              |
| Methyl unodcanoate  | C <sub>12</sub> H <sub>26</sub> O              | 214 | 34.5          | 16.5          | 81.7         | 9.2           | 8.7          | 27.6         | 9.6           | 6.6           | 11.6          | 4.7          | 6.2          | 4.2          | 0.0         | 11.6         | 77.7         | 18.2         | 9.7          | 5.1          |
| Dodecanol           | C <sub>13</sub> H <sub>28</sub> O              | 228 | 10.4          | 5.3           | 19.4         | 2.7           | 2.9          | 1.5          | 1.4           | 2.0           | 1.7           | 2.4          | 0.2          | 0.9          | 0.0         | 1.5          | 5.2          | 4.8          | 0.0          | 2.0          |
| Tetradecanol        | C <sub>14</sub> H <sub>30</sub> O              | 242 | 82.8          | 32.0          | 52.9         | 34.9          | 29.5         | 32.0         | 8.9           | 16.6          | 17.1          | 18.4         | 4.7          | 6.1          | 0.0         | 9.5          | 31.7         | 20.5         | 9.9          | 17.9         |
| Pentadecanol        | C <sub>15</sub> H <sub>32</sub> O              | 256 | 44.0          | 12.8          | 32.0         | 29.5          | 33.6         | 32.1         | 6.3           | 18.5          | 16.2          | 16.6         | 3.0          | 4.8          | 0.0         | 0.8          | 6.1          | 17.4         | 5.4          | 15.2         |
| Hexadecanol         | C <sub>16</sub> H <sub>34</sub> O              | 242 | 177.8         | 43.8          | 70.7         | 80.0          | 112.4        | 104.9        | 26.0          | 51.3          | 59.5          | 63.9         | 9.0          | 12.9         | 0.6         | 25.6         | 26.7         | 63.7         | 22.6         | 66.8         |
| Heptadecanol        | C <sub>17</sub> H <sub>36</sub> O              | 256 | 19.9          | 3.0           | 10.0         | 13.2          | 22.0         | 20.9         | 4.9           | 10.1          | 13.2          | 10.4         | 0.0          | 1.4          | 0.0         | 4.1          | 4.0          | 9.9          | 0.7          | 9.8          |
| Octadecanol         | C <sub>18</sub> H <sub>38</sub> O              | 270 | 44.6          | 58.8          | 71.9         | 19.4          | 44.1         | 25.1         | 16.0          | 22.1          | 52.3          | 34.8         | 18.4         | 26.0         | 8.7         | 52.6         | 44.0         | 41.0         | 50.1         | 23.4         |
| Nonadecanol         | C <sub>19</sub> H <sub>40</sub> O              | 284 | 1.2           | 1.8           | 2.4          | 0.7           | 2.2          | 0.8          | 0.9           | 1.6           | 2.9           | 1.5          | 0.0          | 0.7          | 0.0         | 0.4          | 4.5          | 0.1          | 0.0          | 1.9          |
| Eicosanol           | C <sub>20</sub> H <sub>42</sub> O              | 298 | 17.6          | 5.1           | 10.0         | 2.6           | 6.0          | 4.3          | 2.9           | 2.8           | 4.8           | 5.1          | 0.0          | 0.3          | 0.0         | 1.3          | 3.1          | 2.0          | 1.0          | 3.4          |
| Heneicosanol        | C <sub>21</sub> H <sub>44</sub> O              | 308 | 1.0           | 4.9           | 8.8          | 2.0           | 1.7          | 0.9          | 1.3           | 0.7           | 1.8           | 2.7          | 0.0          | 0.2          | 6.9         | 0.3          | 0.2          | 1.2          | 0.3          | 1.9          |
| Docosanol           | C <sub>22</sub> H <sub>46</sub> O              | 326 | 12.9          | 0.8           | 81.4         | 6.3           | 18.9         | 16.9         | 8.2           | 10.6          | 20.0          | 15.9         | 10.2         | 12.2         | 0.0         | 47.8         | 21.5         | 12.7         | 23.4         | 20.8         |
| Triacosanol         | C <sub>23</sub> H <sub>48</sub> O              | 340 | 2.7           | 4.8           | 18.0         | 0.0           | 5.1          | 1.0          | 0.6           | 0.2           | 3.7           | 2.9          | 0.0          | 0.0          | 9.9         | 0.0          | 0.0          | 0.0          | 0.0          | 2.8          |
| Tetracosanol        | C <sub>24</sub> H <sub>50</sub> O              | 354 | 12.0          | 0.1           | 61.4         | 10.1          | 19.9         | 6.1          | 5.4           | 21.6          | 10.6          | 11.4         | 8.1          | 8.4          | 0.0         | 40.0         | 33.5         | 2.7          | 2.4          | 46.5         |

|              |                                   |     |       |       |       |       |       |       |      |       |       |       |      |      |      |       |       |       |       |       |
|--------------|-----------------------------------|-----|-------|-------|-------|-------|-------|-------|------|-------|-------|-------|------|------|------|-------|-------|-------|-------|-------|
| Pentacosanol | C <sub>25</sub> H <sub>52</sub> O | 368 | 1.0   | 1.5   | 13.0  | 0.0   | 0.7   | 0.0   | 0.0  | 0.0   | 0.1   | 1.2   | 0.0  | 0.0  | 0.0  | 0.0   | 0.0   | 0.0   | 1.6   |       |
| Hexacosanol  | C <sub>26</sub> H <sub>54</sub> O | 382 | 4.7   | 8.3   | 39.0  | 0.6   | 4.0   | 0.5   | 1.0  | 0.6   | 4.7   | 7.6   | 0.0  | 0.0  | 0.0  | 0.0   | 1.2   | 0.0   | 5.3   |       |
| Heptacosanol | C <sub>27</sub> H <sub>56</sub> O | 396 | 0.3   | 0.0   | 10.4  | 0.0   | 0.0   | 0.0   | 0.0  | 0.0   | 0.0   | 0.3   | 0.0  | 0.0  | 1.2  | 0.0   | 0.0   | 0.0   | 1.0   |       |
| Octacosanol  | C <sub>28</sub> H <sub>58</sub> O | 410 | 15.7  | 18.6  | 76.6  | 1.4   | 6.6   | 1.2   | 2.9  | 2.2   | 8.1   | 20.8  | 0.0  | 0.0  | 0    | 0.0   | 0.2   | 2.7   | 14.5  |       |
| Total        |                                   |     | 483.1 | 218.2 | 659.4 | 212.7 | 318.3 | 276.0 | 96.5 | 167.4 | 228.3 | 220.7 | 59.8 | 77.9 | 27.2 | 195.4 | 258.5 | 198.2 | 125.3 | 239.7 |
| CPI(e/o)     |                                   |     | 4.6   | 4.9   | 4.1   | 3.2   | 3.5   | 3.3   | 4.6  | 3.9   | 4.5   | 4.7   | 15.7 | 8.2  | 0.5  | 24.8  | 8.0   | 4.4   | 16.9  | 5.5   |

Wax inputs

|              |  |  |             |             |              |             |             |             |             |             |             |             |             |             |            |             |             |             |             |             |
|--------------|--|--|-------------|-------------|--------------|-------------|-------------|-------------|-------------|-------------|-------------|-------------|-------------|-------------|------------|-------------|-------------|-------------|-------------|-------------|
| <b>Total</b> |  |  | <b>45.2</b> | <b>27.9</b> | <b>258.2</b> | <b>18.4</b> | <b>49.4</b> | <b>24.7</b> | <b>17.6</b> | <b>34.9</b> | <b>43.5</b> | <b>55.7</b> | <b>18.3</b> | <b>20.6</b> | <b>0.0</b> | <b>87.8</b> | <b>55.2</b> | <b>19.3</b> | <b>25.8</b> | <b>87.1</b> |
| %            |  |  | 9.4%        | 12.8%       | 39.2%        | 8.6%        | 15.5%       | 9.0%        | 18.2%       | 20.9%       | 19.0%       | 25.3%       | 30.6%       | 26.4%       | 0.0%       | 44.9%       | 21.4%       | 9.8%        | 20.6%       | 36.3%       |

Algal inputs

|              |  |  |              |              |              |              |              |              |             |             |              |              |             |             |            |              |              |              |             |              |
|--------------|--|--|--------------|--------------|--------------|--------------|--------------|--------------|-------------|-------------|--------------|--------------|-------------|-------------|------------|--------------|--------------|--------------|-------------|--------------|
| <b>Total</b> |  |  | <b>357.3</b> | <b>156.1</b> | <b>287.2</b> | <b>146.2</b> | <b>200.7</b> | <b>194.0</b> | <b>63.5</b> | <b>99.4</b> | <b>145.4</b> | <b>127.0</b> | <b>38.3</b> | <b>49.4</b> | <b>9.3</b> | <b>100.5</b> | <b>183.2</b> | <b>145.4</b> | <b>93.1</b> | <b>116.5</b> |
| %            |  |  | 74.0%        | 71.5%        | 43.5%        | 68.7%        | 63.1%        | 70.3%        | 65.8%       | 59.4%       | 63.7%        | 57.5%        | 64.0%       | 63.4%       | 34.1%      | 51.5%        | 70.9%        | 73.4%        | 74.3%       | 48.6%        |
| Terr/Aqutic  |  |  | 0.13         | 0.18         | 0.90         | 0.13         | 0.25         | 0.13         | 0.28        | 0.35        | 0.30         | 0.44         | 0.48        | 0.42        | 0.00       | 0.87         | 0.30         | 0.13         | 0.28        | 0.75         |

Microbal inputs

|              |  |  |             |             |             |             |             |             |             |             |             |             |            |            |            |            |             |             |            |             |
|--------------|--|--|-------------|-------------|-------------|-------------|-------------|-------------|-------------|-------------|-------------|-------------|------------|------------|------------|------------|-------------|-------------|------------|-------------|
| <b>Total</b> |  |  | <b>75.5</b> | <b>23.0</b> | <b>63.8</b> | <b>46.1</b> | <b>60.7</b> | <b>55.3</b> | <b>13.4</b> | <b>32.2</b> | <b>34.0</b> | <b>31.0</b> | <b>3.2</b> | <b>7.8</b> | <b>0.0</b> | <b>6.8</b> | <b>19.9</b> | <b>32.2</b> | <b>6.2</b> | <b>28.8</b> |
| %            |  |  | 15.6%       | 10.5%       | 9.7%        | 21.7%       | 19.1%       | 20.0%       | 13.9%       | 19.2%       | 14.9%       | 14.0%       | 5.4%       | 10.0%      | 0.0%       | 3.5%       | 7.7%        | 16.3%       | 4.9%       | 12.0%       |

Plasticizers/Antioxidants

|                                   |                                                |     |              |              |              |              |              |             |             |              |              |              |             |              |             |              |              |              |              |              |
|-----------------------------------|------------------------------------------------|-----|--------------|--------------|--------------|--------------|--------------|-------------|-------------|--------------|--------------|--------------|-------------|--------------|-------------|--------------|--------------|--------------|--------------|--------------|
| Diethyl phthalate                 | C <sub>12</sub> H <sub>14</sub> O <sub>4</sub> | 222 | 5.4          | 3.6          | 7.8          | 7.3          | 5.7          | 3.7         | 3.3         | 3.1          | 2.9          | 7.5          | 2.1         | 2.3          | 2.8         | 5.8          | 4.1          | 7.0          | 5.1          | 5.7          |
| Di-isobutyl phthalate             | C <sub>16</sub> H <sub>22</sub> O <sub>4</sub> | 278 | 61.5         | 67.1         | 120.2        | 68.8         | 76.2         | 43.0        | 31.1        | 43.5         | 50.7         | 68.2         | 21.4        | 43.4         | 10.5        | 59.6         | 67.4         | 59.9         | 51.0         | 64.9         |
| Dibutyl phthalate                 | C <sub>16</sub> H <sub>22</sub> O <sub>4</sub> | 278 | 175.5        | 132.2        | 185.2        | 41.4         | 119.5        | 47.0        | 38.8        | 78.9         | 100.1        | 117.8        | 26.0        | 61.4         | 24.9        | 54.5         | 74.7         | 78.6         | 47.6         | 76.8         |
| Di(2-ethylhexyl) phthalate (DEHP) | C <sub>24</sub> H <sub>38</sub> O <sub>4</sub> | 390 | 3.1          | 1.3          | 8.1          | 2.3          | 2.5          | 3.1         | 1.9         | 1.2          | 2.7          | 2.9          | 2.0         | 1.3          | 0.5         | 3.2          | 1.7          | 3.8          | 5.3          | 2.0          |
| <b>Total</b>                      |                                                |     | <b>245.5</b> | <b>204.2</b> | <b>321.3</b> | <b>119.8</b> | <b>203.8</b> | <b>96.8</b> | <b>75.0</b> | <b>126.7</b> | <b>156.5</b> | <b>196.4</b> | <b>51.5</b> | <b>108.4</b> | <b>38.7</b> | <b>123.2</b> | <b>147.9</b> | <b>149.2</b> | <b>109.1</b> | <b>149.4</b> |
| %                                 |                                                |     |              |              |              |              |              |             |             |              |              |              |             |              |             |              |              |              |              |              |

| Station #       |             |      | 29   | 30   | 31   | 32   | 34   | 36   | 37    | 38    | 40   | 41    | 42    | 43    | 45   |     |     |     |    |
|-----------------|-------------|------|------|------|------|------|------|------|-------|-------|------|-------|-------|-------|------|-----|-----|-----|----|
| TEOM (ng/g)     |             |      | 4463 | 3701 | 1180 | 8753 | 8349 | 8825 | 23446 | 10583 | 2396 | 10283 | 14010 | 44747 | 2515 | Min | Max | Avg | SD |
| Compound (ng/g) | Composition | M.W. |      |      |      |      |      |      |       |       |      |       |       |       |      |     |     |     |    |

n-Alkanes

|             |                                      |     |      |      |      |      |      |       |      |     |      |     |      |       |      |  |  |  |  |
|-------------|--------------------------------------|-----|------|------|------|------|------|-------|------|-----|------|-----|------|-------|------|--|--|--|--|
| Pentadecane | C <sub>15</sub> H <sub>32</sub>      | 212 | 0.2  | 0.2  | 0.0  | 1.9  | 0.5  | 0.4   | 2.0  | 0.0 | 0.5  | 0.4 | 1.7  | 7.4   | 0.7  |  |  |  |  |
| Hexadecane  | C <sub>16</sub> H <sub>34</sub>      | 226 | 2.1  | 5.1  | 0.9  | 6.6  | 2.1  | 18.9  | 14.0 | 0.0 | 1.9  | 1.7 | 7.5  | 29.0  | 1.8  |  |  |  |  |
| Heptadecane | C <sub>17</sub> H <sub>36</sub>      | 240 | 11.2 | 18.9 | 27.6 | 36.8 | 10.0 | 383.8 | 56.3 | 0.0 | 20.6 | 7.2 | 21.0 | 120.8 | 10.4 |  |  |  |  |
| Pristane    | C <sub>19</sub> H <sub>40</sub> (Pr) | 268 | 1.3  | 0.5  | 0.8  | 1.3  | 0.7  | 6.6   | 1.6  | 0.0 | 0.8  | 0.8 | 1.1  | 8.2   | 0.4  |  |  |  |  |

|                     |                                                    |     |       |       |       |       |       |        |       |     |       |       |       |        |       |     |        |       |       |
|---------------------|----------------------------------------------------|-----|-------|-------|-------|-------|-------|--------|-------|-----|-------|-------|-------|--------|-------|-----|--------|-------|-------|
| Octadecane          | C <sub>18</sub> H <sub>38</sub>                    | 256 | 18.7  | 24.4  | 6.7   | 17.1  | 5.4   | 207.2  | 29.2  | 0.0 | 15.0  | 8.1   | 19.1  | 70.7   | 6.5   |     |        |       |       |
| Phytane             | C <sub>20</sub> H <sub>42</sub> (Phy) <sup>1</sup> | 282 | 4.8   | 2.4   | 2.0   | 1.9   | 0.7   | 95.5   | 13.9  | 0.0 | 3.2   | 2.4   | 7.7   | 68.6   | 3.0   |     |        |       |       |
| Nonadecane          | C <sub>19</sub> H <sub>40</sub>                    | 268 | 4.9   | 3.1   | 5.4   | 2.0   | 2.7   | 95.7   | 9.3   | 0.0 | 23.2  | 2.9   | 1.9   | 11.8   | 0.0   |     |        |       |       |
| Eicosane            | C <sub>20</sub> H <sub>42</sub>                    | 282 | 22.6  | 22.6  | 8.6   | 30.5  | 12.3  | 33.2   | 46.7  | 0.0 | 16.0  | 19.3  | 15.2  | 78.2   | 5.7   |     |        |       |       |
| Heneicosane         | C <sub>21</sub> H <sub>44</sub>                    | 296 | 10.5  | 10.4  | 5.7   | 16.6  | 5.5   | 188.7  | 12.2  | 0.0 | 13.8  | 5.5   | 7.2   | 218.9  | 5.4   |     |        |       |       |
| Docosane            | C <sub>22</sub> H <sub>46</sub>                    | 310 | 13.4  | 14.5  | 7.3   | 20.9  | 7.8   | 183.8  | 11.3  | 0.0 | 8.5   | 8.2   | 11.1  | 36.0   | 5.1   |     |        |       |       |
| Tricosane           | C <sub>23</sub> H <sub>48</sub>                    | 324 | 12.0  | 11.4  | 11.0  | 18.4  | 8.4   | 162.5  | 9.1   | 0.0 | 8.5   | 7.2   | 9.9   | 42.1   | 6.7   |     |        |       |       |
| Tetracosane         | C <sub>24</sub> H <sub>50</sub>                    | 338 | 11.3  | 11.7  | 5.6   | 15.9  | 10.9  | 151.6  | 7.1   | 0.0 | 7.5   | 7.3   | 6.9   | 27.2   | 6.4   |     |        |       |       |
| Pentacosane         | C <sub>25</sub> H <sub>52</sub>                    | 352 | 11.7  | 9.6   | 15.5  | 13.6  | 11.2  | 432.4  | 28.1  | 0.0 | 11.0  | 7.0   | 5.8   | 191.3  | 10.9  |     |        |       |       |
| Hexacosane          | C <sub>26</sub> H <sub>54</sub>                    | 366 | 8.0   | 8.2   | 3.7   | 10.0  | 11.6  | 92.3   | 4.9   | 0.0 | 6.0   | 5.7   | 5.0   | 18.2   | 7.2   |     |        |       |       |
| Heptacosane         | C <sub>27</sub> H <sub>56</sub>                    | 380 | 10.4  | 13.0  | 15.9  | 9.1   | 10.5  | 103.0  | 9.2   | 0.0 | 9.6   | 5.6   | 10.3  | 63.0   | 11.3  |     |        |       |       |
| Octacosane          | C <sub>28</sub> H <sub>58</sub>                    | 394 | 5.7   | 6.6   | 2.5   | 6.2   | 7.7   | 46.6   | 4.1   | 0.0 | 3.9   | 3.5   | 3.0   | 10.4   | 4.4   |     |        |       |       |
| Nonacosane          | C <sub>29</sub> H <sub>60</sub>                    | 408 | 6.8   | 10.9  | 7.0   | 5.7   | 5.9   | 68.1   | 8.4   | 0.0 | 7.3   | 3.2   | 5.5   | 26.8   | 7.6   |     |        |       |       |
| Triacontane         | C <sub>30</sub> H <sub>62</sub>                    | 422 | 2.9   | 3.8   | 1.2   | 3.5   | 3.1   | 16.6   | 1.7   | 0.0 | 2.7   | 2.1   | 1.1   | 4.4    | 2.3   |     |        |       |       |
| Hentriacontane      | C <sub>31</sub> H <sub>64</sub>                    | 436 | 5.2   | 10.4  | 5.3   | 3.4   | 2.8   | 41.6   | 9.4   | 0.0 | 8.4   | 1.0   | 3.0   | 10.8   | 5.0   |     |        |       |       |
| Dotriacontane       | C <sub>32</sub> H <sub>66</sub>                    | 450 | 0.9   | 1.5   | 0.3   | 0.7   | 0.9   | 9.7    | 1.1   | 0.0 | 1.0   | 0.5   | 0.3   | 1.6    | 0.6   |     |        |       |       |
| Tritriacontane      | C <sub>33</sub> H <sub>68</sub>                    | 464 | 2.5   | 3.2   | 2.3   | 0.1   | 0.4   | 0.0    | 4.2   | 0.0 | 2.5   | 0.2   | 0.0   | 2.7    | 1.7   |     |        |       |       |
| Tetratriacontane    | C <sub>34</sub> H <sub>70</sub>                    | 478 | 0.0   | 0.0   | 0.0   | 0.0   | 0.0   | 0.0    | 0.0   | 0.0 | 0.0   | 0.0   | 0.0   | 0.0    | 0.0   |     |        |       |       |
| Pentatriacontane    | C <sub>35</sub> H <sub>72</sub>                    | 492 | 0.0   | 0.0   | 0.0   | 0.0   | 0.0   | 0.0    | 0.0   | 0.0 | 0.0   | 0.0   | 0.0   | 0.0    | 0.0   |     |        |       |       |
| Hexatriacontane     | C <sub>36</sub> H <sub>74</sub>                    | 506 | 0.0   | 0.0   | 0.0   | 0.0   | 0.0   | 0.0    | 0.0   | 0.0 | 0.0   | 0.0   | 0.0   | 0.0    | 0.0   |     |        |       |       |
| Heptatriacontane    | C <sub>37</sub> H <sub>76</sub>                    | 520 | 0.0   | 0.0   | 0.0   | 0.0   | 0.0   | 0.0    | 0.0   | 0.0 | 0.0   | 0.0   | 0.0   | 0.0    | 0.0   |     |        |       |       |
| Total               |                                                    |     | 167.1 | 192.0 | 135.4 | 222.2 | 121.3 | 2338.2 | 283.9 | 0.0 | 171.8 | 100.0 | 144.3 | 1048.2 | 102.8 | 0.0 | 2338.2 | 302.6 | 446.7 |
| CPI(o/e)            |                                                    |     | 0.9   | 0.9   | 2.6   | 1.0   | 0.9   | 1.9    | 1.2   | 0.0 | 1.7   | 0.7   | 1.0   | 2.5    | 1.5   | 0.0 | 2.7    | 1.2   | 0.6   |
| LMW/HMW             |                                                    |     | 2.0   | 1.8   | 1.5   | 3.1   | 1.2   | 1.8    | 2.7   | 0.0 | 2.2   | 2.3   | 3.0   | 1.9    | 0.9   | 0.0 | 4.2    | 2.0   | 0.9   |
| TAR                 |                                                    |     | 0.9   | 1.2   | 0.8   | 0.3   | 1.1   | 0.3    | 0.4   | 0.0 | 0.5   | 0.6   | 0.6   | 0.3    | 1.5   | 0.0 | 3.0    | 0.8   | 0.6   |
| Wax n-alkanes       |                                                    |     |       |       |       |       |       |        |       |     |       |       |       |        |       |     |        |       |       |
| Total               |                                                    |     | 11.4  | 21.4  | 24.7  | 3.4   | 2.2   | 98.5   | 21.8  | 0.0 | 17.3  | 1.1   | 12.0  | 77.8   | 14.7  | 0.0 | 137.7  | 25.3  | 36.5  |
| %                   |                                                    |     | 0.1   | 0.1   | 0.2   | 0.0   | 0.0   | 0.0    | 0.1   | 0.0 | 0.1   | 0.0   | 0.1   | 0.1    | 0.1   | 0.0 | 0.3    | 0.1   | 0.1   |
| Algal n-Alkanes     |                                                    |     |       |       |       |       |       |        |       |     |       |       |       |        |       |     |        |       |       |
| Total               |                                                    |     | 16.4  | 17.8  | 35.0  | 45.4  | 15.0  | 555.6  | 58.2  | 0.0 | 49.6  | 11.2  | 18.5  | 309.1  | 12.4  | 0.0 | 555.6  | 58.6  | 109.9 |
| %                   |                                                    |     | 0.1   | 0.1   | 0.3   | 0.2   | 0.1   | 0.2    | 0.2   | 0.0 | 0.3   | 0.1   | 0.1   | 0.3    | 0.1   | 0.0 | 0.3    | 0.2   | 0.1   |
| Bacterial n-Alkanes |                                                    |     |       |       |       |       |       |        |       |     |       |       |       |        |       |     |        |       |       |
| Total               |                                                    |     | 43.5  | 52.1  | 16.2  | 54.2  | 19.8  | 259.3  | 89.9  | 0.0 | 32.9  | 29.1  | 41.9  | 177.9  | 14.0  | 0.0 | 259.3  | 51.3  | 55.6  |
| %                   |                                                    |     | 0.3   | 0.3   | 0.1   | 0.2   | 0.2   | 0.1    | 0.3   | 0.0 | 0.2   | 0.3   | 0.3   | 0.2    | 0.1   | 0.0 | 0.3    | 0.2   | 0.1   |

|                                      |                                 |     |      |       |      |       |      |        |       |     |      |      |      |       |      |     |        |       |       |
|--------------------------------------|---------------------------------|-----|------|-------|------|-------|------|--------|-------|-----|------|------|------|-------|------|-----|--------|-------|-------|
| Petroleum n-alkanes                  |                                 |     | 95.9 | 100.8 | 59.5 | 119.2 | 84.3 | 1424.8 | 113.9 | 0.0 | 72.0 | 58.6 | 71.9 | 483.5 | 61.7 | 0.0 | 1424.8 | 167.4 | 264.0 |
| %                                    |                                 |     | 0.6  | 0.5   | 0.4  | 0.5   | 0.7  | 0.6    | 0.4   | 0.0 | 0.4  | 0.6  | 0.5  | 0.5   | 0.6  | 0.0 | 0.7    | 0.5   | 0.1   |
|                                      |                                 |     | 0.8  |       |      |       |      |        |       |     |      |      |      |       |      |     |        |       |       |
| Hopanes                              |                                 |     |      |       |      |       |      |        |       |     |      |      |      |       |      |     |        |       |       |
| Trisnorneohopane                     | C <sub>27</sub> H <sub>46</sub> | 370 | 2.0  | 0.0   | 0.8  | 5.8   | 0.0  | 0.0    | 0.0   | 0.0 | 0.0  | 0.0  | 0.0  | 41.6  | 0.0  |     |        |       |       |
| 17a(H)-Trisnorhopane                 | C <sub>27</sub> H <sub>46</sub> | 370 | 4.5  | 0.0   | 0.7  | 5.9   | 0.0  | 0.0    | 0.0   | 0.0 | 0.0  | 0.0  | 0.0  | 45.7  | 0.0  |     |        |       |       |
| 17a(H),21b(H)-Norhopane              | C <sub>29</sub> H <sub>50</sub> | 398 | 6.9  | 0.0   | 1.7  | 18.1  | 0.0  | 0.0    | 0.0   | 0.0 | 0.0  | 0.0  | 0.0  | 211.9 | 0.0  |     |        |       |       |
| 17a(H),21b(H)-Hopane                 | C <sub>30</sub> H <sub>52</sub> | 412 | 4.0  | 0.0   | 2.1  | 11.8  | 0.0  | 0.0    | 0.0   | 0.0 | 0.0  | 0.0  | 0.0  | 132.9 | 0.0  |     |        |       |       |
| 17a(H),21b(H)-22S-Homohopane         | C <sub>31</sub> H <sub>54</sub> | 426 | 1.9  | 0.0   | 0.7  | 4.1   | 0.0  | 0.0    | 0.0   | 0.0 | 0.0  | 0.0  | 0.0  | 71.1  | 0.0  |     |        |       |       |
| 17a(H),21b(H)-22R-Homohopane         | C <sub>31</sub> H <sub>54</sub> | 426 | 1.6  | 0.0   | 0.1  | 3.0   | 0.0  | 0.0    | 0.0   | 0.0 | 0.0  | 0.0  | 0.0  | 37.5  | 0.0  |     |        |       |       |
| Gammacerane                          | C <sub>30</sub> H <sub>52</sub> | 412 | 0.1  | 0.0   | 0.1  | 0.3   | 0.0  | 0.0    | 0.0   | 0.0 | 0.0  | 0.0  | 0.0  | 22.1  | 0.0  |     |        |       |       |
| 17a(H),21b(H)-22S-Bishomohopane      | C <sub>32</sub> H <sub>56</sub> | 440 | 0.7  | 0.0   | 1.1  | 2.9   | 0.0  | 0.0    | 0.0   | 0.0 | 0.0  | 0.0  | 0.0  | 62.5  | 0.0  |     |        |       |       |
| 17a(H),21b(H)-22R-Bishomohopane      | C <sub>32</sub> H <sub>56</sub> | 440 | 0.2  | 0.0   | 0.5  | 1.2   | 0.0  | 0.0    | 0.0   | 0.0 | 0.0  | 0.0  | 0.0  | 41.2  | 0.0  |     |        |       |       |
| 17a(H),21b(H)-22S-Trishomohopane     | C <sub>33</sub> H <sub>58</sub> | 454 | 0.0  | 0.0   | 0.0  | 0.9   | 0.0  | 0.0    | 0.0   | 0.0 | 0.0  | 0.0  | 0.0  | 15.5  | 0.0  |     |        |       |       |
| 17a(H),21b(H)-22R-Trishomohopane     | C <sub>33</sub> H <sub>58</sub> | 454 | 0.0  | 0.0   | 0.0  | 0.3   | 0.0  | 0.0    | 0.0   | 0.0 | 0.0  | 0.0  | 0.0  | 10.5  | 0.0  |     |        |       |       |
| 17a(H),21b(H)-22S-Tetrakishomohopane | C <sub>34</sub> H <sub>60</sub> | 468 | 0.0  | 0.0   | 0.0  | 0.0   | 0.0  | 0.0    | 0.0   | 0.0 | 0.0  | 0.0  | 0.0  | 14.2  | 0.0  |     |        |       |       |
| 17a(H),21b(H)-22R-Tetrakishomohopane | C <sub>34</sub> H <sub>60</sub> | 468 | 0.0  | 0.0   | 0.0  | 0.0   | 0.0  | 0.0    | 0.0   | 0.0 | 0.0  | 0.0  | 0.0  | 17.0  | 0.0  |     |        |       |       |
| 17a(H),21b(H)-22S-Pentakishomohopane | C <sub>35</sub> H <sub>62</sub> | 482 | 0.0  | 0.0   | 0.0  | 0.0   | 0.0  | 0.0    | 0.0   | 0.0 | 0.0  | 0.0  | 0.0  | 5.8   | 0.0  |     |        |       |       |
| 17a(H),21b(H)-22R-Pentakishomohopane | C <sub>35</sub> H <sub>62</sub> | 482 | 0.0  | 0.0   | 0.0  | 0.0   | 0.0  | 0.0    | 0.0   | 0.0 | 0.0  | 0.0  | 0.0  | 6.7   | 0.0  |     |        |       |       |
| Total                                |                                 |     | 21.8 | 0.0   | 7.7  | 54.1  | 0.0  | 0.0    | 0.0   | 0.0 | 0.0  | 0.0  | 0.0  | 736.3 | 0.0  | 0.0 | 736.3  | 29.8  | 132.3 |
| C <sub>31</sub> S/(R+S)              |                                 |     | 0.6  | ND    | 0.8  | 0.6   | ND   | ND     | ND    | ND  | ND   | ND   | ND   | 0.7   | ND   | 0.6 | 0.8    | 0.7   | 0.1   |
| C <sub>32</sub> S/(R+S)              |                                 |     | 0.8  | ND    | 0.7  | 0.7   | ND   | ND     | ND    | ND  | ND   | ND   | ND   | 0.6   | ND   | 0.6 | 1.0    | 0.7   | 0.1   |
| Steranes                             |                                 |     |      |       |      |       |      |        |       |     |      |      |      |       |      |     |        |       |       |
| 13b,17a-20S-Cholestane Diasterane    | C <sub>27</sub> H <sub>48</sub> | 372 | 0.0  | 0.0   | 0.0  | 0.0   | 0.0  | 0.0    | 0.0   | 0.0 | 0.0  | 0.0  | 0.0  | 0.0   | 0.0  |     |        |       |       |
| 13b,17a-20R-Cholestane Diasterane    | C <sub>27</sub> H <sub>48</sub> | 372 | 0.0  | 0.0   | 0.0  | 0.0   | 0.0  | 0.0    | 0.0   | 0.0 | 0.0  | 0.0  | 0.0  | 0.0   | 0.0  |     |        |       |       |
| 13a,17b-20S-Cholestane Diasterane    | C <sub>27</sub> H <sub>48</sub> | 372 | 0.0  | 0.0   | 0.0  | 0.0   | 0.0  | 0.0    | 0.0   | 0.0 | 0.0  | 0.0  | 0.0  | 0.0   | 0.0  |     |        |       |       |
| 13a,17b-20R-Cholestane Diasterane    | C <sub>27</sub> H <sub>48</sub> | 372 | 0.0  | 0.0   | 0.0  | 0.0   | 0.0  | 0.0    | 0.0   | 0.0 | 0.0  | 0.0  | 0.0  | 0.0   | 0.0  |     |        |       |       |
| 14a,17ba-20S-Cholestane              | C <sub>27</sub> H <sub>48</sub> | 372 | 0.0  | 0.0   | 0.0  | 0.0   | 0.0  | 0.0    | 0.0   | 0.0 | 0.0  | 0.0  | 0.0  | 0.0   | 0.0  |     |        |       |       |
| 14b,17b-20R-Cholestane               | C <sub>27</sub> H <sub>48</sub> | 372 | 0.0  | 0.0   | 0.0  | 0.0   | 0.0  | 0.0    | 0.0   | 0.0 | 0.0  | 0.0  | 0.0  | 0.0   | 0.0  |     |        |       |       |
| 14b,17b-20S-Cholestane               | C <sub>27</sub> H <sub>48</sub> | 372 | 0.0  | 0.0   | 0.0  | 0.0   | 0.0  | 0.0    | 0.0   | 0.0 | 0.0  | 0.0  | 0.0  | 0.0   | 0.0  |     |        |       |       |
| 14a,17ba-20R-Cholestane              | C <sub>27</sub> H <sub>48</sub> | 372 | 0.0  | 0.0   | 0.0  | 0.0   | 0.0  | 0.0    | 0.0   | 0.0 | 0.0  | 0.0  | 0.0  | 0.0   | 0.0  |     |        |       |       |
| 14a,17ba-20S-Ergostane               | C <sub>28</sub> H <sub>50</sub> | 386 | 0.0  | 0.0   | 0.0  | 0.0   | 0.0  | 0.0    | 0.0   | 0.0 | 0.0  | 0.0  | 0.0  | 0.0   | 0.0  |     |        |       |       |
| 14b,17b-20R-Ergostane                | C <sub>28</sub> H <sub>50</sub> | 386 | 0.0  | 0.0   | 0.0  | 0.0   | 0.0  | 0.0    | 0.0   | 0.0 | 0.0  | 0.0  | 0.0  | 0.0   | 0.0  |     |        |       |       |
| 14b,17b-20S-Ergostane                | C <sub>28</sub> H <sub>50</sub> | 386 | 0.0  | 0.0   | 0.0  | 0.0   | 0.0  | 0.0    | 0.0   | 0.0 | 0.0  | 0.0  | 0.0  | 0.0   | 0.0  |     |        |       |       |

|                            |                                                |     |              |      |       |       |        |       |        |       |      |       |       |        |       |      |        |       |       |
|----------------------------|------------------------------------------------|-----|--------------|------|-------|-------|--------|-------|--------|-------|------|-------|-------|--------|-------|------|--------|-------|-------|
| 14a,17ba-20R-Ergostane     | C <sub>28</sub> H <sub>50</sub>                | 386 | 0.0          | 0.0  | 0.0   | 0.0   | 0.0    | 0.0   | 0.0    | 0.0   | 0.0  | 0.0   | 0.0   | 0.0    | 0.0   |      |        |       |       |
| 14a,17ba-20S-Stigmastane   | C <sub>29</sub> H <sub>52</sub>                | 400 | 0.0          | 0.0  | 0.0   | 0.0   | 0.0    | 0.0   | 0.0    | 0.0   | 0.0  | 0.0   | 0.0   | 0.0    | 0.0   |      |        |       |       |
| 14b,17b-20R-Stigmastane    | C <sub>29</sub> H <sub>52</sub>                | 400 | 0.0          | 0.0  | 0.0   | 0.0   | 0.0    | 0.0   | 0.0    | 0.0   | 0.0  | 0.0   | 0.0   | 0.0    | 0.0   |      |        |       |       |
| 14b,17b-20S-Stigmastane    | C <sub>29</sub> H <sub>52</sub>                | 400 | 0.0          | 0.0  | 0.0   | 0.0   | 0.0    | 0.0   | 0.0    | 0.0   | 0.0  | 0.0   | 0.0   | 0.0    | 0.0   |      |        |       |       |
| 14a,17ba-20R-Stigmastane   | C <sub>29</sub> H <sub>52</sub>                | 400 | 0.0          | 0.0  | 0.0   | 0.0   | 0.0    | 0.0   | 0.0    | 0.0   | 0.0  | 0.0   | 0.0   | 0.0    | 0.0   |      |        |       |       |
| <b>Total</b>               |                                                |     | <b>0.0</b>   | 0.0  | 0.0   | 0.0   | 0.0    | 0.0   | 0.0    | 0.0   | 0.0  | 0.0   | 0.0   | 0.0    | 0.0   |      |        |       |       |
| <b>PAHs</b>                |                                                |     |              |      |       |       |        |       |        |       |      |       |       |        |       |      |        |       |       |
| Phenanthrene               | C <sub>14</sub> H <sub>10</sub>                | 178 | 0.0          | 0.1  | 0.0   | 0.4   | 0.0    | 0.0   | 0.0    | 0.0   | 0.1  | 0.2   | 0.1   | 5.8    | 0.0   |      |        |       |       |
| Anthracene                 | C <sub>14</sub> H <sub>10</sub>                | 178 | 2.8          | 0.6  | 0.0   | 8.0   | 0.0    | 0.0   | 0.0    | 0.0   | 0.6  | 7.0   | 2.1   | 20.6   | 0.0   |      |        |       |       |
| Benzo[k]fluoranthene       | C <sub>20</sub> H <sub>12</sub>                | 252 | 20.1         | 22.2 | 0.0   | 30.6  | 15.0   | 15.0  | 110.2  | 32.8  | 0.0  | 35.0  | 40.6  | 313.2  | 0.0   |      |        |       |       |
| Benzo[b]fluoranthene       | C <sub>20</sub> H <sub>12</sub>                | 252 | 14.0         | 15.1 | 0.0   | 21.2  | 9.3    | 10.4  | 66.0   | 21.7  | 0.0  | 19.4  | 23.9  | 205.7  | 0.0   |      |        |       |       |
| <b>Total</b>               |                                                |     | <b>36.9</b>  | 37.9 | 0.0   | 60.3  | 24.4   | 25.4  | 176.2  | 54.5  | 0.6  | 61.5  | 66.8  | 545.4  | 0.0   | 0.0  | 545.4  | 54.5  | 96.8  |
| Ant/(Ant+Phe)              |                                                |     | 1.0          | 0.9  | 0.0   | 0.9   | 0.0    | 0.0   | 0.0    | 0.0   | 0.9  | 1.0   | 1.0   | 0.8    | 0.0   | 0.0  | 1.0    | 0.7   | 0.4   |
| <b>Methyl n-Alkanoates</b> |                                                |     |              |      |       |       |        |       |        |       |      |       |       |        |       |      |        |       |       |
| Methyl hexadecanoate       | C <sub>17</sub> H <sub>34</sub> O <sub>2</sub> | 270 | 73.2         | 42.2 | 27.8  | 65.6  | 64.3   | 80.3  | 114.9  | 58.2  | 44.1 | 60.7  | 78.5  | 147.7  | 50.0  |      |        |       |       |
| Methyl octadecenoate       | C <sub>19</sub> H <sub>38</sub> O <sub>2</sub> | 298 | 6.1          | 3.3  | 1.2   | 8.0   | 13.6   | 22.3  | 15.3   | 5.1   | 8.7  | 8.1   | 9.7   | 11.6   | 4.7   |      |        |       |       |
| <b>Total</b>               |                                                |     | <b>79.3</b>  | 45.5 | 29.1  | 73.6  | 77.9   | 102.6 | 130.2  | 63.3  | 52.8 | 68.8  | 88.1  | 159.3  | 54.7  |      |        |       |       |
| <b>Total FA</b>            |                                                |     |              |      |       |       |        |       |        |       |      |       |       |        |       |      |        |       |       |
| Nonanoic acid              | C <sub>9</sub> H <sub>18</sub> O <sub>2</sub>  | 158 | 12.7         | 1.8  | 13.7  | 6.9   | 45.5   | 2.3   | 85.7   | 26.1  | 0.0  | 23.7  | 8.9   | 79.4   | 37.6  |      |        |       |       |
| Decanoic acid              | C <sub>10</sub> H <sub>20</sub> O <sub>2</sub> | 172 | 4.4          | 0.6  | 4.7   | 2.5   | 19.8   | 1.1   | 44.4   | 11.1  | 0.0  | 9.1   | 3.0   | 38.4   | 14.4  |      |        |       |       |
| Undecanoic acid            | C <sub>11</sub> H <sub>22</sub> O <sub>2</sub> | 186 | 1.9          | 0.1  | 2.7   | 1.0   | 9.7    | 0.0   | 25.0   | 5.4   | 0.0  | 4.1   | 0.8   | 18.3   | 7.1   |      |        |       |       |
| Dodecanoic acid            | C <sub>12</sub> H <sub>24</sub> O <sub>2</sub> | 200 | 4.3          | 1.2  | 5.5   | 1.8   | 21.2   | 0.1   | 56.5   | 11.6  | 0.0  | 8.8   | 1.6   | 38.0   | 13.2  |      |        |       |       |
| Tridecanoic acid           | C <sub>13</sub> H <sub>26</sub> O <sub>2</sub> | 214 | 2.7          | 1.5  | 2.8   | 1.7   | 10.2   | 0.1   | 30.8   | 6.3   | 0.0  | 5.0   | 2.2   | 19.5   | 5.6   |      |        |       |       |
| Tetradecanoic acid         | C <sub>14</sub> H <sub>28</sub> O <sub>2</sub> | 228 | 10.7         | 2.2  | 15.1  | 4.6   | 59.0   | 3.0   | 150.2  | 32.2  | 0.2  | 28.4  | 3.4   | 85.4   | 28.9  |      |        |       |       |
| Pentadecanoic acid         | C <sub>15</sub> H <sub>30</sub> O <sub>2</sub> | 242 | 6.3          | 1.7  | 9.5   | 2.0   | 36.7   | 0.1   | 93.6   | 20.2  | 0.1  | 17.3  | 1.1   | 44.1   | 17.1  |      |        |       |       |
| Hexadecanoic acid          | C <sub>16</sub> H <sub>32</sub> O <sub>2</sub> | 256 | 201.3        | 61.8 | 236.3 | 97.2  | 712.2  | 88.3  | 1434.9 | 425.4 | 47.3 | 369.2 | 100.9 | 756.2  | 375.0 |      |        |       |       |
| Heptadecanoic acid         | C <sub>17</sub> H <sub>34</sub> O <sub>2</sub> | 270 | 2.5          | 0.1  | 3.4   | 0.4   | 12.5   | 0.3   | 34.8   | 8.0   | 0.1  | 6.6   | 0.2   | 15.9   | 5.4   |      |        |       |       |
| Octadecanoic acid          | C <sub>18</sub> H <sub>36</sub> O <sub>2</sub> | 284 | 91.2         | 14.3 | 145.8 | 25.7  | 484.5  | 26.4  | 969.2  | 260.3 | 10.3 | 211.5 | 22.3  | 395.0  | 241.5 |      |        |       |       |
| Nonadecanoic acid          | C <sub>19</sub> H <sub>38</sub> O <sub>2</sub> | 298 | 0.2          | 0.1  | 1.7   | 0.3   | 0.2    | 0.7   | 4.2    | 0.6   | 0.7  | 0.4   | 0.1   | 8.7    | 1.7   |      |        |       |       |
| Eicosanoic acid            | C <sub>20</sub> H <sub>40</sub> O <sub>2</sub> | 312 | 0.4          | 0.1  | 1.1   | 0.4   | 3.9    | 0.1   | 13.9   | 2.3   | 0.0  | 1.7   | 0.2   | 5.1    | 1.5   |      |        |       |       |
| <b>Total</b>               |                                                |     | <b>338.6</b> | 85.5 | 442.1 | 144.4 | 1415.4 | 122.4 | 2943.1 | 809.5 | 58.6 | 685.9 | 144.6 | 1504.0 | 749.0 | 43.3 | 2973.2 | 745.8 | 799.6 |
| CPI(e/o)                   |                                                |     | 11.9         | 15.0 | 12.1  | 10.8  | 11.3   | 33.5  | 9.7    | 11.1  | 66.8 | 11.0  | 9.8   | 7.1    | 9.1   | 4.3  | 66.8   | 15.3  | 13.5  |
| <b>Wax FA</b>              |                                                |     | <b>0.0</b>   | 0.0  | 0.0   | 0.0   | 0.0    | 0.0   | 0.0    | 0.0   | 0.0  | 0.0   | 0.0   | 0.0    | 0.0   |      |        |       |       |

# Algal FA

|       |  |  |       |      |       |       |        |       |        |       |      |       |       |        |       |      |        |       |       |
|-------|--|--|-------|------|-------|-------|--------|-------|--------|-------|------|-------|-------|--------|-------|------|--------|-------|-------|
| Total |  |  | 312.4 | 80.2 | 408.4 | 132.2 | 1300.6 | 118.9 | 2669.1 | 742.9 | 57.7 | 628.7 | 131.2 | 1318.2 | 674.5 | 42.6 | 2726.3 | 677.5 | 726.6 |
| %     |  |  | 0.9   | 0.9  | 0.9   | 0.9   | 0.9    | 1.0   | 0.9    | 0.9   | 1.0  | 0.9   | 0.9   | 0.9    | 0.9   | 0.8  | 1.0    | 0.9   | 0.0   |

# Microbial FA

|       |  |  |      |     |      |      |       |     |       |      |     |      |      |       |      |     |       |      |      |
|-------|--|--|------|-----|------|------|-------|-----|-------|------|-----|------|------|-------|------|-----|-------|------|------|
| Total |  |  | 26.2 | 5.4 | 33.7 | 12.2 | 114.7 | 3.5 | 274.1 | 66.7 | 0.9 | 57.2 | 13.4 | 185.8 | 74.5 | 0.7 | 274.1 | 68.3 | 76.0 |
| %     |  |  | 0.1  | 0.1 | 0.1  | 0.1  | 0.1   | 0.0 | 0.1   | 0.1  | 0.0 | 0.1  | 0.1  | 0.1   | 0.1  | 0.0 | 0.2   | 0.1  | 0.0  |

# n-Alkanols

|                    |                                   |     |       |       |      |       |      |       |        |       |       |       |       |        |      |      |        |       |        |
|--------------------|-----------------------------------|-----|-------|-------|------|-------|------|-------|--------|-------|-------|-------|-------|--------|------|------|--------|-------|--------|
| Methyl unodcanoate | C <sub>12</sub> H <sub>26</sub> O | 214 | 18.2  | 17.2  | 2.0  | 7.8   | 22.6 | 11.4  | 841.4  | 9.0   | 10.6  | 5.1   | 20.4  | 188.2  | 8.0  |      |        |       |        |
| Dodecanol          | C <sub>13</sub> H <sub>28</sub> O | 228 | 3.9   | 4.5   | 0.0  | 3.0   | 1.9  | 1.0   | 181.0  | 2.4   | 0.0   | 0.6   | 5.4   | 64.6   | 1.5  |      |        |       |        |
| Tetradecanol       | C <sub>14</sub> H <sub>30</sub> O | 242 | 14.3  | 13.9  | 2.8  | 18.9  | 9.6  | 12.9  | 511.7  | 9.3   | 12.3  | 5.8   | 14.5  | 197.6  | 10.4 |      |        |       |        |
| Pentadecanol       | C <sub>15</sub> H <sub>32</sub> O | 256 | 5.5   | 8.1   | 2.7  | 20.4  | 6.5  | 10.6  | 358.0  | 8.8   | 7.7   | 5.3   | 8.1   | 279.2  | 9.5  |      |        |       |        |
| Hexadecanol        | C <sub>16</sub> H <sub>34</sub> O | 242 | 29.5  | 19.6  | 10.6 | 59.5  | 17.5 | 54.7  | 698.7  | 22.2  | 28.3  | 19.5  | 32.2  | 505.6  | 29.2 |      |        |       |        |
| Heptadecanol       | C <sub>17</sub> H <sub>36</sub> O | 256 | 3.5   | 4.2   | 1.4  | 11.4  | 2.8  | 4.6   | 155.4  | 4.7   | 3.8   | 4.8   | 4.1   | 186.8  | 4.2  |      |        |       |        |
| Octadecanol        | C <sub>18</sub> H <sub>38</sub> O | 270 | 26.5  | 45.1  | 9.6  | 24.8  | 18.9 | 28.7  | 614.5  | 33.9  | 18.8  | 25.9  | 25.1  | 428.9  | 13.4 |      |        |       |        |
| Nonadecanol        | C <sub>19</sub> H <sub>40</sub> O | 284 | 0.1   | 1.8   | 0.0  | 0.5   | 0.9  | 0.6   | 101.9  | 0.7   | 0.4   | 1.8   | 1.7   | 15.1   | 0.2  |      |        |       |        |
| Eicosanol          | C <sub>20</sub> H <sub>42</sub> O | 298 | 3.6   | 10.2  | 5.4  | 3.0   | 3.5  | 3.3   | 78.0   | 3.7   | 5.0   | 2.8   | 1.5   | 204.8  | 5.9  |      |        |       |        |
| Heneicosanol       | C <sub>21</sub> H <sub>44</sub> O | 308 | 0.6   | 3.0   | 4.4  | 1.9   | 3.2  | 1.1   | 71.8   | 3.5   | 4.8   | 2.3   | 2.7   | 38.0   | 8.2  |      |        |       |        |
| Docosanol          | C <sub>22</sub> H <sub>46</sub> O | 326 | 22.3  | 82.0  | 2.9  | 12.2  | 2.9  | 9.2   | 725.6  | 18.5  | 37.2  | 9.7   | 18.7  | 352.7  | 3.7  |      |        |       |        |
| Triacosanol        | C <sub>23</sub> H <sub>48</sub> O | 340 | 2.3   | 4.1   | 0.8  | 3.7   | 0.0  | 0.0   | 43.2   | 0.1   | 2.3   | 0.0   | 0.2   | 55.6   | 0.0  |      |        |       |        |
| Tetracosanol       | C <sub>24</sub> H <sub>50</sub> O | 354 | 11.4  | 12.9  | 4.2  | 21.9  | 4.3  | 15.0  | 1011.3 | 0.3   | 14.8  | 18.4  | 4.9   | 65.6   | 1.7  |      |        |       |        |
| Pentacosanol       | C <sub>25</sub> H <sub>52</sub> O | 368 | 0.0   | 0.0   | 0.0  | 0.2   | 0.0  | 0.0   | 12.6   | 0.0   | 0.3   | 0.0   | 0.0   | 25.4   | 0.0  |      |        |       |        |
| Hexacosanol        | C <sub>26</sub> H <sub>54</sub> O | 382 | 2.2   | 6.8   | 2.7  | 2.9   | 0.0  | 0.3   | 59.8   | 0.6   | 7.9   | 0.0   | 1.9   | 126.6  | 0.5  |      |        |       |        |
| Heptacosanol       | C <sub>27</sub> H <sub>56</sub> O | 396 | 0.0   | 0.3   | 0.0  | 0.0   | 0.0  | 0.0   | 4.0    | 0.0   | 0.7   | 0.0   | 0.0   | 16.9   | 0.0  |      |        |       |        |
| Octacosanol        | C <sub>28</sub> H <sub>58</sub> O | 410 | 5.5   | 12.5  | 7.0  | 4.1   | 0.5  | 3.6   | 138.7  | 1.6   | 13.5  | 1.1   | 3.0   | 223.5  | 0.4  |      |        |       |        |
| Total              |                                   |     | 149.2 | 246.1 | 56.5 | 196.1 | 95.3 | 156.9 | 5607.5 | 119.4 | 168.3 | 103.4 | 144.3 | 2975.3 | 97.0 | 27.2 | 5607.5 | 457.4 | 1085.6 |
| CPI(e/o)           |                                   |     | 7.3   | 7.8   | 4.9  | 3.6   | 3.7  | 7.1   | 4.1    | 4.5   | 6.9   | 5.6   | 4.6   | 3.1    | 2.8  | 0.5  | 24.8   | 6.2   | 4.8    |

# Wax inputs

|       |  |  |      |       |      |      |     |      |        |      |      |      |      |       |     |     |        |       |       |
|-------|--|--|------|-------|------|------|-----|------|--------|------|------|------|------|-------|-----|-----|--------|-------|-------|
| Total |  |  | 41.3 | 114.1 | 16.8 | 41.2 | 7.7 | 28.0 | 1935.3 | 21.1 | 73.3 | 29.3 | 28.4 | 768.4 | 6.4 | 0.0 | 1935.3 | 129.1 | 362.6 |
| %     |  |  | 0.3  | 0.5   | 0.3  | 0.2  | 0.1 | 0.2  | 0.3    | 0.2  | 0.4  | 0.3  | 0.2  | 0.3   | 0.1 | 0.0 | 0.5    | 0.2   | 0.1   |

# Algal inputs

|       |  |  |      |       |      |       |      |       |        |      |      |      |      |        |      |     |        |       |       |
|-------|--|--|------|-------|------|-------|------|-------|--------|------|------|------|------|--------|------|-----|--------|-------|-------|
| Total |  |  | 92.0 | 106.0 | 30.4 | 113.9 | 72.2 | 111.0 | 2744.2 | 78.1 | 74.9 | 59.2 | 93.7 | 1525.1 | 66.9 | 9.3 | 2744.2 | 247.8 | 532.6 |
| %     |  |  | 0.6  | 0.4   | 0.5  | 0.6   | 0.8  | 0.7   | 0.5    | 0.7  | 0.4  | 0.6  | 0.6  | 0.5    | 0.7  | 0.3 | 0.8    | 0.6   | 0.1   |

|                         |  |             |      |     |      |      |      |       |      |      |      |      |       |      |     |       |      |       |
|-------------------------|--|-------------|------|-----|------|------|------|-------|------|------|------|------|-------|------|-----|-------|------|-------|
| Terr/Aqutic             |  | 0.4         | 1.1  | 0.6 | 0.4  | 0.1  | 0.3  | 0.7   | 0.3  | 1.0  | 0.5  | 0.3  | 0.5   | 0.1  | 0.0 | 1.1   | 0.4  | 0.3   |
| <b>Microbial inputs</b> |  |             |      |     |      |      |      |       |      |      |      |      |       |      |     |       |      |       |
| <b>Total</b>            |  | <b>13.0</b> | 18.6 | 4.0 | 35.3 | 12.1 | 16.8 | 796.3 | 16.6 | 11.9 | 12.6 | 19.3 | 545.8 | 15.5 | 0.0 | 796.3 | 66.4 | 165.7 |
| %                       |  | 0.1         | 0.1  | 0.1 | 0.2  | 0.1  | 0.1  | 0.1   | 0.1  | 0.1  | 0.1  | 0.1  | 0.2   | 0.2  | 0.0 | 0.2   | 0.1  | 0.1   |

|                                   |                                                |              |       |      |       |       |       |       |       |       |       |       |       |       |      |       |       |       |
|-----------------------------------|------------------------------------------------|--------------|-------|------|-------|-------|-------|-------|-------|-------|-------|-------|-------|-------|------|-------|-------|-------|
| <b>Plasticizers/Antioxidants</b>  |                                                |              |       |      |       |       |       |       |       |       |       |       |       |       |      |       |       |       |
| Diethyl phthalate                 | C <sub>12</sub> H <sub>14</sub> O <sub>4</sub> | 222          | 5.2   | 2.4  | 2.8   | 5.2   | 1.8   | 4.2   | 11.1  | 5.6   | 2.6   | 18.8  | 7.0   | 22.7  | 3.8  |       |       |       |
| Di-isobutyl phthalate             | C <sub>16</sub> H <sub>22</sub> O <sub>4</sub> | 278          | 65.5  | 43.5 | 13.9  | 61.6  | 28.9  | 45.1  | 109.6 | 48.3  | 33.6  | 196.2 | 56.8  | 146.4 | 31.3 |       |       |       |
| Dibutyl phthalate                 | C <sub>16</sub> H <sub>22</sub> O <sub>4</sub> | 278          | 65.2  | 70.0 | 17.9  | 77.9  | 76.0  | 96.2  | 698.7 | 59.3  | 25.9  | 167.6 | 99.5  | 505.6 | 67.9 |       |       |       |
| Di(2-ethylhexyl) phthalate (DEHP) | C <sub>24</sub> H <sub>38</sub> O <sub>4</sub> | 390          | 2.3   | 3.1  | 0.3   | 1.9   | 1.7   | 1.3   | 3.3   | 1.8   | 74.9  | 8.1   | 5.0   | 15.4  | 1.2  |       |       |       |
| <b>Total</b>                      |                                                | <b>138.2</b> | 119.0 | 34.9 | 146.6 | 108.4 | 146.8 | 822.7 | 115.0 | 137.0 | 390.8 | 168.3 | 690.1 | 104.3 | 34.9 | 822.7 | 185.3 | 169.9 |

## Alwajh Lagoon

| Concentration in ng/g |                                      |      | Station # |      |     |     |     |      |     |      |      |      |      |      |      |
|-----------------------|--------------------------------------|------|-----------|------|-----|-----|-----|------|-----|------|------|------|------|------|------|
| Compound              | Composition                          | M.W. | 14        | 21   | 48  | 60  | 72  | 79   | 87  | 98   | 100  | 104  | 116  | 128  | 129  |
| n-Alkanes             |                                      |      |           |      |     |     |     |      |     |      |      |      |      |      |      |
| Tetradecane           | C <sub>14</sub> H <sub>30</sub>      | 198  | 0.6       | 0.4  | 0.1 | 0.2 | 0.1 | 0.4  | 0.0 | 0.1  | 0.2  | 0.2  | 0.1  | 0.1  | 0.5  |
| Pentadecane           | C <sub>15</sub> H <sub>32</sub>      | 212  | 2.5       | 0.7  | 0.1 | 0.5 | 0.3 | 1.4  | 0.1 | 0.4  | 0.7  | 0.7  | 0.4  | 0.3  | 1.0  |
| Hexadecane            | C <sub>16</sub> H <sub>34</sub>      | 226  | 32.8      | 9.4  | 1.4 | 6.8 | 4.3 | 16.8 | 3.9 | 7.8  | 8.3  | 9.2  | 7.4  | 6.3  | 12.6 |
| Heptadecane           | C <sub>17</sub> H <sub>36</sub>      | 240  | 16.3      | 4.3  | 0.6 | 3.1 | 2.3 | 6.6  | 2.3 | 4.3  | 3.6  | 4.4  | 5.1  | 3.3  | 4.8  |
| Pristane              | C <sub>19</sub> H <sub>40</sub> (Pr) | 268  | 1.1       | 0.3  | 0.0 | 0.3 | 0.1 | 0.2  | 0.0 | 0.5  | 0.1  | 0.4  | 0.5  | 0.1  | 0.2  |
| Octadecane            | C <sub>18</sub> H <sub>38</sub>      | 256  | 45.3      | 13.6 | 2.0 | 8.3 | 7.9 | 23.3 | 9.0 | 11.4 | 10.4 | 11.3 | 12.2 | 11.5 | 14.9 |
| Phytanes              | C <sub>20</sub> H <sub>42</sub> (Ph) | 282  | 7.4       | 1.9  | 0.2 | 0.7 | 0.7 | 2.2  | 0.8 | 0.9  | 1.0  | 1.0  | 1.4  | 1.0  | 1.1  |
| Nonadecane            | C <sub>19</sub> H <sub>40</sub>      | 268  | 18.6      | 4.3  | 0.5 | 2.4 | 2.2 | 4.4  | 1.9 | 3.3  | 3.3  | 3.2  | 3.9  | 3.2  | 4.0  |
| Eicosane              | C <sub>20</sub> H <sub>42</sub>      | 282  | 39.1      | 11.1 | 1.8 | 7.0 | 7.5 | 20.1 | 8.6 | 9.9  | 9.1  | 9.1  | 10.5 | 11.0 | 13.4 |
| Heneicosane           | C <sub>21</sub> H <sub>44</sub>      | 296  | 35.4      | 7.2  | 1.2 | 4.2 | 0.2 | 1.8  | 3.6 | 0.2  | 0.4  | 0.2  | 5.2  | 0.4  | 8.4  |
| Docosane              | C <sub>22</sub> H <sub>46</sub>      | 310  | 24.3      | 5.4  | 0.8 | 2.3 | 1.9 | 5.8  | 1.8 | 2.2  | 2.2  | 2.3  | 2.2  | 2.8  | 1.6  |
| Tricosane             | C <sub>23</sub> H <sub>48</sub>      | 324  | 21.0      | 4.5  | 0.7 | 2.6 | 2.6 | 5.9  | 3.0 | 3.8  | 3.3  | 3.6  | 4.0  | 2.4  | 5.1  |
| Tetracosane           | C <sub>24</sub> H <sub>50</sub>      | 338  | 12.8      | 4.9  | 0.4 | 1.4 | 1.7 | 5.1  | 1.9 | 2.1  | 2.1  | 2.0  | 2.4  | 2.3  | 3.1  |
| Pentacosane           | C <sub>25</sub> H <sub>52</sub>      | 352  | 5.0       | 0.5  | 0.1 | 0.2 | 0.2 | 1.0  | 0.2 | 0.3  | 0.3  | 0.3  | 0.3  | 0.4  | 0.5  |
| Hexacosane            | C <sub>26</sub> H <sub>54</sub>      | 366  | 7.1       | 1.8  | 0.2 | 0.9 | 1.0 | 3.2  | 1.1 | 1.3  | 1.1  | 1.2  | 1.4  | 1.3  | 1.8  |
| Heptacosane           | C <sub>27</sub> H <sub>56</sub>      | 380  | 1.6       | 0.5  | 0.1 | 0.1 | 0.2 | 0.9  | 0.3 | 0.2  | 0.3  | 0.4  | 0.3  | 0.2  | 0.5  |
| Octacosane            | C <sub>28</sub> H <sub>58</sub>      | 394  | 2.6       | 0.1  | 0.1 | 0.3 | 0.4 | 1.4  | 0.4 | 0.5  | 0.4  | 0.5  | 0.5  | 0.4  | 0.8  |
| Nonacosane            | C <sub>29</sub> H <sub>60</sub>      | 408  | 1.5       | 0.2  | 0.0 | 0.0 | 0.1 | 0.5  | 0.0 | 0.3  | 0.2  | 0.1  | 0.1  | 0.0  | 0.2  |

|                                      |                                 |     |              |              |              |              |              |              |              |              |              |              |              |              |              |
|--------------------------------------|---------------------------------|-----|--------------|--------------|--------------|--------------|--------------|--------------|--------------|--------------|--------------|--------------|--------------|--------------|--------------|
| Triacontane                          | C <sub>30</sub> H <sub>62</sub> | 422 | 1.2          | 0.7          | 0.1          | 0.2          | 0.2          | 0.9          | 0.3          | 0.3          | 0.3          | 0.3          | 0.3          | 0.3          | 0.5          |
| Hentriacontane                       | C <sub>31</sub> H <sub>64</sub> | 436 | 1.6          | 0.1          | 0.1          | 0.3          | 0.3          | 1.4          | 0.3          | 0.4          | 0.3          | 0.5          | 0.4          | 0.4          | 0.8          |
| Dotriacontane                        | C <sub>32</sub> H <sub>66</sub> | 450 | 0.1          | 0.0          | 0.0          | 0.0          | 0.0          | 0.3          | 0.0          | 0.1          | 0.1          | 0.2          | 0.1          | 0.1          | 0.2          |
| Trtriacontane                        | C <sub>33</sub> H <sub>68</sub> | 464 | 0.2          | 0.0          | 0.0          | 0.1          | 0.0          | 0.4          | 0.0          | 0.1          | 0.1          | 0.1          | 0.0          | 0.1          | 0.1          |
| <b>Total</b>                         |                                 |     | <b>278.2</b> | <b>71.7</b>  | <b>10.5</b>  | <b>42.0</b>  | <b>34.2</b>  | <b>104.0</b> | <b>39.7</b>  | <b>50.2</b>  | <b>47.7</b>  | <b>51.2</b>  | <b>59.0</b>  | <b>48.0</b>  | <b>76.2</b>  |
| <b>CPI(o/e)</b>                      |                                 |     | <b>0.6</b>   | <b>0.5</b>   | <b>0.5</b>   | <b>0.5</b>   | <b>0.3</b>   | <b>0.3</b>   | <b>0.4</b>   | <b>0.4</b>   | <b>0.4</b>   | <b>0.4</b>   | <b>0.5</b>   | <b>0.3</b>   | <b>0.5</b>   |
| <b>LMW/HMW</b>                       |                                 |     | <b>11.7</b>  | <b>16.7</b>  | <b>14.9</b>  | <b>17.1</b>  | <b>12.1</b>  | <b>9.1</b>   | <b>12.9</b>  | <b>13.3</b>  | <b>13.7</b>  | <b>12.8</b>  | <b>15.3</b>  | <b>13.4</b>  | <b>12.2</b>  |
| <b>TAR</b>                           |                                 |     | <b>0.11</b>  | <b>0.06</b>  | <b>0.07</b>  | <b>0.06</b>  | <b>0.12</b>  | <b>0.21</b>  | <b>0.08</b>  | <b>0.10</b>  | <b>0.10</b>  | <b>0.11</b>  | <b>0.06</b>  | <b>0.11</b>  | <b>0.09</b>  |
| <b>Wax n-alkanes</b>                 |                                 |     |              |              |              |              |              |              |              |              |              |              |              |              |              |
| <b>Total</b>                         |                                 |     | <b>4.2</b>   | <b>0.8</b>   | <b>0.1</b>   | <b>0.5</b>   | <b>0.6</b>   | <b>2.5</b>   | <b>0.5</b>   | <b>0.7</b>   | <b>0.6</b>   | <b>0.7</b>   | <b>0.6</b>   | <b>0.4</b>   | <b>1.1</b>   |
| <b>%</b>                             |                                 |     | <b>1.5%</b>  | <b>1.1%</b>  | <b>1.1%</b>  | <b>1.1%</b>  | <b>1.7%</b>  | <b>2.4%</b>  | <b>1.3%</b>  | <b>1.4%</b>  | <b>1.2%</b>  | <b>1.4%</b>  | <b>1.1%</b>  | <b>0.8%</b>  | <b>1.4%</b>  |
| <b>Algal n-Alkanes</b>               |                                 |     |              |              |              |              |              |              |              |              |              |              |              |              |              |
| <b>Total</b>                         |                                 |     | <b>72.8</b>  | <b>16.5</b>  | <b>2.4</b>   | <b>10.2</b>  | <b>4.9</b>   | <b>14.1</b>  | <b>7.9</b>   | <b>8.2</b>   | <b>8.0</b>   | <b>8.5</b>   | <b>14.7</b>  | <b>7.2</b>   | <b>18.3</b>  |
| <b>%</b>                             |                                 |     | <b>26%</b>   | <b>23%</b>   | <b>23%</b>   | <b>24%</b>   | <b>14%</b>   | <b>14%</b>   | <b>20%</b>   | <b>16%</b>   | <b>17%</b>   | <b>17%</b>   | <b>25%</b>   | <b>15%</b>   | <b>24%</b>   |
| <b>Bacterial n-Alkanes</b>           |                                 |     |              |              |              |              |              |              |              |              |              |              |              |              |              |
| <b>Total</b>                         |                                 |     | <b>95.9</b>  | <b>28.5</b>  | <b>4.5</b>   | <b>18.4</b>  | <b>17.0</b>  | <b>51.9</b>  | <b>18.7</b>  | <b>24.2</b>  | <b>23.3</b>  | <b>24.4</b>  | <b>24.1</b>  | <b>24.9</b>  | <b>35.0</b>  |
| <b>%</b>                             |                                 |     | <b>34.5%</b> | <b>39.7%</b> | <b>42.7%</b> | <b>43.8%</b> | <b>49.7%</b> | <b>49.9%</b> | <b>47.3%</b> | <b>48.1%</b> | <b>48.9%</b> | <b>47.7%</b> | <b>40.9%</b> | <b>51.9%</b> | <b>45.9%</b> |
| <b>Petroleum n-alkanes</b>           |                                 |     |              |              |              |              |              |              |              |              |              |              |              |              |              |
| <b>%</b>                             |                                 |     | <b>105.3</b> | <b>26.0</b>  | <b>3.5</b>   | <b>13.0</b>  | <b>11.8</b>  | <b>35.4</b>  | <b>12.5</b>  | <b>17.2</b>  | <b>15.8</b>  | <b>17.6</b>  | <b>19.5</b>  | <b>15.5</b>  | <b>21.9</b>  |
| <b>%</b>                             |                                 |     | <b>37.8%</b> | <b>36.3%</b> | <b>32.9%</b> | <b>30.9%</b> | <b>34.4%</b> | <b>34.1%</b> | <b>31.5%</b> | <b>34.2%</b> | <b>33.2%</b> | <b>34.3%</b> | <b>33.1%</b> | <b>32.2%</b> | <b>28.7%</b> |
| <b>Hopanes</b>                       |                                 |     |              |              |              |              |              |              |              |              |              |              |              |              |              |
| Trisnorneohopane                     | C <sub>27</sub> H <sub>46</sub> | 370 | 0.54         | 0.14         | T            | T            | T            | T            | T            | T            | 0.09         | 0.04         | 0.00         | 0.01         | 0.51         |
| 17a(H)-Trisnorhopane                 | C <sub>27</sub> H <sub>46</sub> | 370 | 0.91         | 0.03         | T            | T            | T            | T            | T            | T            | 0.06         | 0.05         | 0.00         | 0.01         | 0.43         |
| 17a(H),21b(H)-Norhopane              | C <sub>29</sub> H <sub>50</sub> | 398 | 2.22         | 0.30         | T            | T            | T            | T            | T            | T            | 0.37         | 0.15         | 0.02         | 0.04         | 2.51         |
| 17a(H),21b(H)-Hopane                 | C <sub>30</sub> H <sub>52</sub> | 412 | 1.90         | 0.33         | T            | T            | T            | T            | T            | T            | 0.33         | 0.16         | 0.02         | 0.05         | 2.63         |
| 17a(H),21b(H)-22S-Homohopane         | C <sub>31</sub> H <sub>54</sub> | 426 | 0.70         | 0.12         | T            | T            | T            | T            | T            | T            | 0.14         | 0.06         | 0.00         | 0.01         | 0.93         |
| 17a(H),21b(H)-22R-Homohopane         | C <sub>31</sub> H <sub>54</sub> | 426 | 0.52         | 0.07         | T            | T            | T            | T            | T            | T            | 0.08         | 0.03         | 0.00         | 0.01         | 0.66         |
| Gammacerane                          | C <sub>30</sub> H <sub>52</sub> | 412 | 0.07         | 0.01         | T            | T            | T            | T            | T            | T            | 0.01         | 0.02         | 0.00         | 0.00         | 0.08         |
| 17a(H),21b(H)-22S-Bishomohopane      | C <sub>32</sub> H <sub>56</sub> | 440 | 0.58         | 0.10         | T            | T            | T            | T            | T            | T            | 0.08         | 0.04         | 0.00         | 0.01         | 0.79         |
| 17a(H),21b(H)-22R-Bishomohopane      | C <sub>32</sub> H <sub>56</sub> | 440 | 0.23         | 0.05         | T            | T            | T            | T            | T            | T            | 0.06         | 0.03         | 0.00         | 0.00         | 0.31         |
| 17a(H),21b(H)-22S-Trishomohopane     | C <sub>33</sub> H <sub>58</sub> | 454 | 0.31         | 0.03         | T            | T            | T            | T            | T            | T            | 0.05         | T            | T            | T            | 0.32         |
| 17a(H),21b(H)-22R-Trishomohopane     | C <sub>33</sub> H <sub>58</sub> | 454 | 0.22         | 0.01         | T            | T            | T            | T            | T            | T            | 0.03         | T            | T            | T            | 0.20         |
| 17a(H),21b(H)-22S-Tetrakishomohopane | C <sub>34</sub> H <sub>60</sub> | 468 | 0.13         | 0.00         | T            | T            | T            | T            | T            | T            | 0.03         | T            | 0.22         | 0.00         | 0.04         |

|                                      |                                 |     |             |             |             |             |             |             |             |             |             |             |             |             |             |
|--------------------------------------|---------------------------------|-----|-------------|-------------|-------------|-------------|-------------|-------------|-------------|-------------|-------------|-------------|-------------|-------------|-------------|
| 17a(H),21b(H)-22R-Tetrakishomohopane | C <sub>34</sub> H <sub>60</sub> | 468 | 0.03        | 0.00        | T           | T           | T           | T           | T           | T           | 0.02        | T           | T           | T           | 0.03        |
| 17a(H),21b(H)-22S-Pentakishomohopane | C <sub>35</sub> H <sub>62</sub> | 482 | 0.00        | 0.00        | T           | T           | T           | T           | T           | T           | 0.00        | T           | T           | T           | T           |
| 17a(H),21b(H)-22R-Pentakishomohopane | C <sub>35</sub> H <sub>62</sub> | 482 | 0.00        | 0.00        | T           | T           | T           | T           | T           | T           | 0.00        | T           | T           | T           | T           |
| <b>Total</b>                         |                                 |     | <b>8.34</b> | <b>1.19</b> | <b>0.00</b> | <b>0.00</b> | <b>0.00</b> | <b>0.00</b> | <b>0.00</b> | <b>0.00</b> | <b>1.35</b> | <b>0.58</b> | <b>0.26</b> | <b>0.13</b> | <b>9.47</b> |
| C <sub>31</sub> S/(R+S)              |                                 |     | 0.57        | 0.62        | ND          | ND          | ND          | ND          | ND          | ND          | 0.64        | 0.63        | 0.46        | 0.58        | 0.59        |
| C <sub>32</sub> S/(R+S)              |                                 |     | 0.71        | 0.69        | ND          | ND          | ND          | ND          | ND          | ND          | 0.58        | 0.54        | 0.58        | 0.66        | 0.72        |

#### Steranes

|                                   |                                 |     |   |   |   |   |   |   |   |   |   |   |   |   |   |
|-----------------------------------|---------------------------------|-----|---|---|---|---|---|---|---|---|---|---|---|---|---|
| 13b,17a-20S-Cholestane Diasterane | C <sub>27</sub> H <sub>48</sub> | 372 | T | T | T | T | T | T | T | T | T | T | T | T | T |
| 13b,17a-20R-Cholestane Diasterane | C <sub>27</sub> H <sub>48</sub> | 372 | T | T | T | T | T | T | T | T | T | T | T | T | T |
| 13a,17b-20S-Cholestane Diasterane | C <sub>27</sub> H <sub>48</sub> | 372 | T | T | T | T | T | T | T | T | T | T | T | T | T |
| 13a,17b-20R-Cholestane Diasterane | C <sub>27</sub> H <sub>48</sub> | 372 | T | T | T | T | T | T | T | T | T | T | T | T | T |
| 14a,17ba-20S-Cholestane           | C <sub>27</sub> H <sub>48</sub> | 372 | T | T | T | T | T | T | T | T | T | T | T | T | T |
| 14b,17b-20R-Cholestane            | C <sub>27</sub> H <sub>48</sub> | 372 | T | T | T | T | T | T | T | T | T | T | T | T | T |
| 14b,17b-20S-Cholestane            | C <sub>27</sub> H <sub>48</sub> | 372 | T | T | T | T | T | T | T | T | T | T | T | T | T |
| 14a,17ba-20R-Cholestane           | C <sub>27</sub> H <sub>48</sub> | 372 | T | T | T | T | T | T | T | T | T | T | T | T | T |
| 14a,17ba-20S-Ergostane            | C <sub>28</sub> H <sub>50</sub> | 386 | T | T | T | T | T | T | T | T | T | T | T | T | T |
| 14b,17b-20R-Ergostane             | C <sub>28</sub> H <sub>50</sub> | 386 | T | T | T | T | T | T | T | T | T | T | T | T | T |
| 14b,17b-20S-Ergostane             | C <sub>28</sub> H <sub>50</sub> | 386 | T | T | T | T | T | T | T | T | T | T | T | T | T |
| 14a,17ba-20R-Ergostane            | C <sub>28</sub> H <sub>50</sub> | 386 | T | T | T | T | T | T | T | T | T | T | T | T | T |
| 14a,17ba-20S-Stigmastane          | C <sub>29</sub> H <sub>52</sub> | 400 | T | T | T | T | T | T | T | T | T | T | T | T | T |
| 14b,17b-20R-Stigmastane           | C <sub>29</sub> H <sub>52</sub> | 400 | T | T | T | T | T | T | T | T | T | T | T | T | T |
| 14b,17b-20S-Stigmastane           | C <sub>29</sub> H <sub>52</sub> | 400 | T | T | T | T | T | T | T | T | T | T | T | T | T |
| 14a,17ba-20R-Stigmastane          | C <sub>29</sub> H <sub>52</sub> | 400 | T | T | T | T | T | T | T | T | T | T | T | T | T |
| <b>Total</b>                      |                                 |     |   |   |   |   |   |   |   |   |   |   |   |   |   |

#### PAHs

|                      |                                 |     |             |            |            |            |            |            |            |             |            |            |            |            |             |
|----------------------|---------------------------------|-----|-------------|------------|------------|------------|------------|------------|------------|-------------|------------|------------|------------|------------|-------------|
| Phenanthrene         | C <sub>14</sub> H <sub>10</sub> | 178 | 17.1        | 2.3        | 1.1        | 0.4        | 0.9        | 1.0        | 1.8        | 8.9         | 1.1        | 0.0        | 1.0        | 2.6        | 3.1         |
| Anthracene           | C <sub>14</sub> H <sub>10</sub> | 178 | 20.9        | 2.4        | 0.9        | 0.2        | 1.6        | 0.2        | 1.4        | 6.7         | 1.5        | 0.0        | 1.5        | 5.4        | 6.6         |
| Benzo[k]fluoranthene | C <sub>20</sub> H <sub>12</sub> | 252 | T           | T          | T          | 0.1        | T          | 0.2        | T          | T           | 0.6        | T          | T          | 0.7        | 0.5         |
| Benzo[b]fluoranthene | C <sub>20</sub> H <sub>12</sub> | 252 | T           | T          | T          | 0.0        | T          | 0.0        | T          | T           | 0.3        | T          | T          | 0.3        | 0.4         |
| <b>Total</b>         |                                 |     | <b>38.0</b> | <b>4.7</b> | <b>2.0</b> | <b>0.8</b> | <b>2.5</b> | <b>1.4</b> | <b>3.2</b> | <b>15.6</b> | <b>3.5</b> | <b>0.0</b> | <b>2.5</b> | <b>8.9</b> | <b>10.6</b> |
| Ant/(Ant+Phe)        |                                 |     | 0.6         | 0.5        | 0.5        | 0.4        | 0.7        | 0.2        | 0.4        | 0.4         | 0.6        | 0.0        | 0.6        | 0.7        | 0.7         |

**Methyl alkanoates**

|                       |                                                |     |               |              |              |              |              |              |              |              |             |             |              |              |              |
|-----------------------|------------------------------------------------|-----|---------------|--------------|--------------|--------------|--------------|--------------|--------------|--------------|-------------|-------------|--------------|--------------|--------------|
| Methyl octanoate      | C <sub>9</sub> H <sub>18</sub> O <sub>2</sub>  | 158 | 2.12          | 0.02         | 0.05         | 0.03         | 0.05         | 0.00         | 0.03         | 0.13         | 0.00        | 0.00        | 0.07         | 0.03         | 0.02         |
| Methyl nonanoate      | C <sub>10</sub> H <sub>20</sub> O <sub>2</sub> | 172 | 1.35          | 0.05         | 0.09         | 0.04         | 0.05         | 0.02         | 0.03         | 0.21         | 0.00        | 0.00        | 0.07         | 0.06         | 0.06         |
| Methyl decanoate      | C <sub>11</sub> H <sub>22</sub> O <sub>2</sub> | 186 | 0.41          | 0.02         | 0.04         | 0.02         | 0.02         | 0.02         | 0.01         | 0.08         | 0.00        | 0.00        | 0.02         | 0.04         | 0.02         |
| Methyl undecanoate    | C <sub>12</sub> H <sub>24</sub> O <sub>2</sub> | 200 | 0.59          | 0.03         | 0.04         | 0.03         | 0.03         | 0.04         | 0.01         | 0.12         | 0.01        | 0.00        | 0.03         | 0.06         | 0.04         |
| Methyl dodecanoate    | C <sub>13</sub> H <sub>26</sub> O <sub>2</sub> | 214 | 1.43          | 0.12         | 0.10         | 0.09         | 0.07         | 0.51         | 0.05         | 0.49         | 0.06        | 0.01        | 0.13         | 0.10         | 0.09         |
| Methyl tridecanoate   | C <sub>14</sub> H <sub>28</sub> O <sub>2</sub> | 228 | 1.34          | 0.22         | 0.10         | 0.13         | 0.10         | 0.49         | 0.11         | 0.60         | 0.09        | 0.02        | 0.07         | 0.18         | 0.31         |
| Methyl tetradecanoate | C <sub>15</sub> H <sub>30</sub> O <sub>2</sub> | 242 | 4.79          | 0.63         | 0.34         | 0.44         | 0.30         | 1.33         | 0.39         | 2.18         | 0.34        | 0.07        | 0.50         | 0.65         | 0.71         |
| Methyl pentadecanoate | C <sub>16</sub> H <sub>32</sub> O <sub>2</sub> | 256 | 2.68          | 0.27         | 0.19         | 0.29         | 0.20         | 0.58         | 0.23         | 1.18         | 0.13        | 0.03        | 0.27         | 0.30         | 0.29         |
| Methyl hexadecanoate  | C <sub>17</sub> H <sub>32</sub> O <sub>2</sub> | 268 | 0.00          | 0.00         | 0.00         | 0.00         | 0.00         | 0.00         | 0.00         | 0.00         | 0.00        | 0.00        | 0.00         | 0.01         | 0.01         |
| Methyl hexadecanoate  | C <sub>17</sub> H <sub>34</sub> O <sub>2</sub> | 270 | 74.76         | 14.64        | 4.81         | 7.35         | 5.83         | 30.48        | 7.32         | 34.26        | 6.51        | 1.37        | 7.83         | 12.14        | 19.34        |
| Methyl heptadecenoate | C <sub>18</sub> H <sub>34</sub> O <sub>2</sub> | 282 | 1.09          | 0.10         | 0.11         | 0.10         | 0.07         | 0.33         | 0.15         | 0.54         | 0.04        | 0.01        | 0.10         | 0.12         | 0.21         |
| Methyl octadecanoate  | C <sub>19</sub> H <sub>36</sub> O <sub>2</sub> | 296 | 0.00          | 0.00         | 0.00         | 0.00         | 0.00         | 0.00         | 0.00         | 0.00         | 0.00        | 0.00        | 0.00         | 0.01         | 0.00         |
| Methyl octadecenoate  | C <sub>19</sub> H <sub>38</sub> O <sub>2</sub> | 298 | 43.08         | 5.46         | 5.98         | 5.54         | 3.83         | 8.96         | 6.00         | 27.80        | 2.47        | 0.52        | 3.73         | 4.56         | 3.86         |
| Methyl nonadecanoate  | C <sub>20</sub> H <sub>40</sub> O <sub>2</sub> | 312 | 3.32          | 0.04         | 0.04         | 0.05         | 0.04         | 0.16         | 0.05         | 0.23         | 0.06        | 0.01        | 0.05         | 0.12         | 0.32         |
| <b>Total</b>          |                                                |     | <b>136.95</b> | <b>21.52</b> | <b>11.71</b> | <b>14.04</b> | <b>10.48</b> | <b>42.89</b> | <b>14.31</b> | <b>67.43</b> | <b>9.72</b> | <b>2.04</b> | <b>12.71</b> | <b>18.25</b> | <b>25.19</b> |

**CPI(e/o)**
**Total FA**

|                    |                                                |     |       |       |      |      |      |       |      |       |       |      |      |       |       |
|--------------------|------------------------------------------------|-----|-------|-------|------|------|------|-------|------|-------|-------|------|------|-------|-------|
| Pentanoic acid     | C <sub>5</sub> H <sub>10</sub> O <sub>2</sub>  | 102 | 0.01  | 0.01  | 0.00 | 0.00 | 0.00 | 1.55  | 0.16 | 0.05  | 0.21  | 0.00 | 0.02 | 0.43  | 1.60  |
| Hexanoic acid      | C <sub>6</sub> H <sub>12</sub> O <sub>2</sub>  | 116 | 0.05  | 0.04  | 0.00 | 0.00 | 0.00 | 5.26  | 0.60 | 0.07  | 0.78  | 0.00 | 0.01 | 2.24  | 4.23  |
| Heptanoic acid     | C <sub>7</sub> H <sub>14</sub> O <sub>2</sub>  | 130 | 0.12  | 0.45  | 0.00 | 0.00 | 0.00 | 4.59  | 0.56 | 0.16  | 0.87  | 0.00 | 0.01 | 2.53  | 3.63  |
| Octanoic acid      | C <sub>8</sub> H <sub>16</sub> O <sub>2</sub>  | 144 | 0.31  | 0.70  | 0.00 | 0.00 | 0.00 | 11.90 | 1.17 | 0.39  | 2.18  | 0.00 | 0.06 | 6.61  | 9.29  |
| Nonanoic acid      | C <sub>9</sub> H <sub>18</sub> O <sub>2</sub>  | 158 | 3.36  | 1.46  | 0.05 | 0.03 | 0.05 | 16.42 | 1.92 | 0.76  | 3.97  | 0.00 | 0.24 | 9.03  | 11.95 |
| Dodanoic acid      | C <sub>10</sub> H <sub>20</sub> O <sub>2</sub> | 172 | 3.25  | 2.63  | 0.09 | 0.04 | 0.05 | 4.82  | 0.62 | 0.53  | 1.40  | 0.00 | 0.17 | 2.98  | 3.36  |
| Undecanoic acid    | C <sub>11</sub> H <sub>22</sub> O <sub>2</sub> | 186 | 1.45  | 0.71  | 0.04 | 0.02 | 0.02 | 2.81  | 0.32 | 0.22  | 0.84  | 0.00 | 0.07 | 1.61  | 1.73  |
| Dodecanoic acid    | C <sub>12</sub> H <sub>24</sub> O <sub>2</sub> | 200 | 0.93  | 0.32  | 0.04 | 0.03 | 0.03 | 4.38  | 0.53 | 0.37  | 1.32  | 0.00 | 0.04 | 2.64  | 2.50  |
| Tridecanoic acid   | C <sub>13</sub> H <sub>26</sub> O <sub>2</sub> | 214 | 2.25  | 0.62  | 0.10 | 0.09 | 0.07 | 2.55  | 0.34 | 1.55  | 0.76  | 0.01 | 0.22 | 1.41  | 1.37  |
| Tetradecanoic acid | C <sub>14</sub> H <sub>28</sub> O <sub>2</sub> | 228 | 5.02  | 5.46  | 0.10 | 0.13 | 0.10 | 7.88  | 1.05 | 1.01  | 2.16  | 0.02 | 0.54 | 4.73  | 4.65  |
| Pentadecanoic acid | C <sub>15</sub> H <sub>30</sub> O <sub>2</sub> | 242 | 8.67  | 6.33  | 0.34 | 0.44 | 0.30 | 5.45  | 0.78 | 2.45  | 1.42  | 0.07 | 0.59 | 3.27  | 2.91  |
| Hexadecenoic acid  | C <sub>16</sub> H <sub>30</sub> O <sub>2</sub> | 254 | 2.91  | 0.32  | 0.19 | 0.29 | 0.20 | 0.89  | 0.24 | 1.20  | 0.14  | 0.03 | 0.28 | 0.30  | 0.38  |
| Hexadecanoic acid  | C <sub>16</sub> H <sub>32</sub> O <sub>2</sub> | 256 | 7.76  | 0.86  | 0.00 | 0.00 | 0.00 | 55.77 | 8.38 | 3.52  | 20.36 | 0.00 | 1.24 | 39.92 | 39.00 |
| Heptadecanoic acid | C <sub>17</sub> H <sub>34</sub> O <sub>2</sub> | 270 | 75.55 | 24.47 | 4.81 | 7.35 | 5.83 | 31.75 | 7.41 | 34.33 | 6.83  | 1.37 | 7.85 | 13.14 | 19.35 |

|                     |                                                |     |               |              |              |              |              |               |              |               |              |              |              |               |               |
|---------------------|------------------------------------------------|-----|---------------|--------------|--------------|--------------|--------------|---------------|--------------|---------------|--------------|--------------|--------------|---------------|---------------|
| Octadecenoic acid   | C <sub>18</sub> H <sub>34</sub> O <sub>2</sub> | 282 | 3.17          | 0.30         | 0.11         | 0.10         | 0.07         | 0.37          | 0.15         | 0.54          | 0.04         | 0.01         | 0.10         | 0.15          | 21.00         |
| Octadecanoic acid   | C <sub>18</sub> H <sub>36</sub> O <sub>2</sub> | 284 | 5.90          | 0.80         | 0.00         | 0.00         | 0.00         | 36.77         | 2.81         | 1.49          | 9.61         | 0.00         | 0.37         | 25.47         | 0.17          |
| Nonadecanoic acid   | C <sub>19</sub> H <sub>38</sub> O <sub>2</sub> | 298 | 43.08         | 5.51         | 5.98         | 5.54         | 3.83         | 10.57         | 6.24         | 27.92         | 2.56         | 0.52         | 3.73         | 5.17          | 3.97          |
| Eicosanoic acid     | C <sub>20</sub> H <sub>40</sub> O <sub>2</sub> | 312 | 3.32          | 0.59         | 0.04         | 0.05         | 0.04         | 0.54          | 0.05         | 0.36          | 0.06         | 0.01         | 0.05         | 0.95          | 0.32          |
| Heneicosanoic acid  | C <sub>21</sub> H <sub>42</sub> O <sub>2</sub> | 326 | 136.95        | 21.66        | 11.71        | 14.04        | 10.48        | 43.10         | 14.31        | 67.43         | 9.72         | 2.04         | 12.71        | 18.25         | 25.19         |
| <b>Total</b>        |                                                |     | <b>304.03</b> | <b>73.25</b> | <b>23.60</b> | <b>28.15</b> | <b>21.08</b> | <b>247.37</b> | <b>47.63</b> | <b>144.37</b> | <b>65.22</b> | <b>4.08</b>  | <b>28.30</b> | <b>140.82</b> | <b>156.61</b> |
| <b>CPI(e/o)</b>     |                                                |     | <b>0.10</b>   | <b>0.19</b>  | <b>0.01</b>  | <b>0.01</b>  | <b>0.01</b>  | <b>1.07</b>   | <b>0.47</b>  | <b>0.06</b>   | <b>1.39</b>  | <b>0.01</b>  | <b>0.10</b>  | <b>1.56</b>   | <b>0.89</b>   |
|                     |                                                |     |               |              |              |              |              |               |              |               |              |              |              |               |               |
| <b>Wax FA</b>       |                                                |     | <b>0.00</b>   | <b>0.00</b>  | <b>0.00</b>  | <b>0.00</b>  | <b>0.00</b>  | <b>0.00</b>   | <b>0.00</b>  | <b>0.00</b>   | <b>0.00</b>  | <b>0.00</b>  | <b>0.00</b>  | <b>0.00</b>   | <b>0.00</b>   |
|                     |                                                |     |               |              |              |              |              |               |              |               |              |              |              |               |               |
| <b>Algal FA</b>     |                                                |     |               |              |              |              |              |               |              |               |              |              |              |               |               |
| <b>Total</b>        |                                                |     | <b>32.6</b>   | <b>12.0</b>  | <b>0.6</b>   | <b>0.6</b>   | <b>0.5</b>   | <b>128.6</b>  | <b>15.6</b>  | <b>9.5</b>    | <b>38.1</b>  | <b>0.1</b>   | <b>2.9</b>   | <b>86.0</b>   | <b>84.9</b>   |
| <b>%</b>            |                                                |     | <b>10.7%</b>  | <b>16.4%</b> | <b>2.4%</b>  | <b>2.3%</b>  | <b>2.3%</b>  | <b>52.0%</b>  | <b>32.7%</b> | <b>6.6%</b>   | <b>58.3%</b> | <b>1.7%</b>  | <b>10.1%</b> | <b>61.1%</b>  | <b>54.2%</b>  |
|                     |                                                |     |               |              |              |              |              |               |              |               |              |              |              |               |               |
| <b>Microbial FA</b> |                                                |     |               |              |              |              |              |               |              |               |              |              |              |               |               |
| <b>Total</b>        |                                                |     | <b>134.35</b> | <b>39.10</b> | <b>11.31</b> | <b>13.47</b> | <b>10.10</b> | <b>69.55</b>  | <b>17.01</b> | <b>67.23</b>  | <b>16.38</b> | <b>1.97</b>  | <b>12.70</b> | <b>33.63</b>  | <b>41.27</b>  |
| <b>%</b>            |                                                |     | 44.2%         | 53.4%        | 47.9%        | 47.9%        | 47.9%        | 28.1%         | 35.7%        | 46.6%         | 25.1%        | 48.3%        | 44.9%        | 23.9%         | 26.4%         |
|                     |                                                |     |               |              |              |              |              |               |              |               |              |              |              |               |               |
| <b>n-Alkanols</b>   |                                                |     |               |              |              |              |              |               |              |               |              |              |              |               |               |
| Undecanol           | C <sub>11</sub> H <sub>24</sub> O              | 172 | 1.20          | 0.21         | 0.04         | 0.13         | 0.08         | 0.41          | 0.06         | 0.25          | 0.21         | 0.06         | 0.15         | 0.55          | 0.44          |
| Dodecanol           | C <sub>12</sub> H <sub>26</sub> O              | 186 | 16.72         | 2.92         | 0.85         | 2.00         | 1.32         | 5.83          | 1.98         | 7.05          | 5.89         | 1.58         | 3.04         | 9.23          | 5.56          |
| Tridecanol          | C <sub>13</sub> H <sub>28</sub> O              | 200 | 6.40          | 1.10         | 0.31         | 0.80         | 0.45         | 1.85          | 0.85         | 2.18          | 1.33         | 0.42         | 1.33         | 1.79          | 0.97          |
| Tetradecanol        | C <sub>14</sub> H <sub>30</sub> O              | 214 | 20.26         | 3.56         | 1.45         | 2.69         | 1.93         | 5.98          | 3.10         | 8.29          | 3.99         | 1.70         | 5.67         | 6.35          | 2.24          |
| Pentadecanol        | C <sub>15</sub> H <sub>32</sub> O              | 228 | 8.92          | 1.16         | 0.67         | 2.51         | 0.99         | 3.54          | 2.29         | 4.19          | 1.76         | 0.80         | 2.77         | 2.38          | 1.30          |
| Hexadecanol         | C <sub>16</sub> H <sub>34</sub> O              | 242 | 40.55         | 5.43         | 2.63         | 5.77         | 3.36         | 8.92          | 4.50         | 8.99          | 3.37         | 2.22         | 8.40         | 6.85          | 2.66          |
| Heptadecanol        | C <sub>17</sub> H <sub>36</sub> O              | 256 | 10.15         | 1.11         | 0.75         | 1.91         | 0.86         | 3.02          | 1.42         | 3.01          | 0.85         | 0.61         | 2.61         | 1.85          | 0.79          |
| Octadecanol         | C <sub>18</sub> H <sub>38</sub> O              | 270 | 35.12         | 6.84         | 1.83         | 4.77         | 4.20         | 12.40         | 8.11         | 17.22         | 6.69         | 3.59         | 14.37        | 10.47         | 5.75          |
| Nonadecanol         | C <sub>19</sub> H <sub>40</sub> O              | 284 | 3.52          | 0.52         | 0.16         | 0.45         | 0.34         | 1.01          | 0.57         | 1.18          | 0.43         | 0.23         | 0.93         | 0.68          | 0.78          |
| Eicosanol           | C <sub>20</sub> H <sub>42</sub> O              | 298 | 5.80          | 0.98         | 0.30         | 0.87         | 0.62         | 3.00          | 1.20         | 2.13          | 0.73         | 1.42         | 2.44         | 2.72          | 0.72          |
| Heneicosanol        | C <sub>21</sub> H <sub>44</sub> O              | 312 | 1.73          | 0.33         | 0.10         | 0.21         | 0.17         | 0.46          | 0.49         | 0.86          | 0.35         | 0.13         | 0.63         | 2.45          | 1.02          |
| Docosanol           | C <sub>22</sub> H <sub>46</sub> O              | 326 | 6.14          | 1.32         | 0.68         | 5.89         | 1.74         | 0.88          | 12.69        | 19.87         | 0.94         | 3.13         | 10.13        | 14.04         | 7.84          |
| Triacosanol         | C <sub>23</sub> H <sub>48</sub> O              | 340 | 1.92          | 0.38         | 0.09         | 0.33         | 0.18         | 0.53          | 0.65         | 1.26          | 0.40         | 0.15         | 0.62         | 0.83          | 0.26          |
| Tetracosanol        | C <sub>24</sub> H <sub>50</sub> O              | 354 | 1.71          | 3.63         | 0.08         | 9.86         | 0.66         | 27.87         | 8.06         | 7.61          | 2.75         | 1.66         | 3.74         | 3.65          | 3.18          |
| Pentacosanol        | C <sub>25</sub> H <sub>52</sub> O              | 368 | 0.28          | 0.13         | 0.04         | 0.01         | 0.03         | 0.07          | 0.05         | 0.20          | 0.07         | 0.03         | 0.21         | 0.11          | 0.07          |
| Hexacosanol         | C <sub>26</sub> H <sub>54</sub> O              | 382 | 1.65          | 0.31         | 0.20         | 0.22         | 0.18         | 0.41          | 0.35         | 0.63          | 0.30         | 0.19         | 0.93         | 0.51          | 0.09          |
| <b>Total</b>        |                                                |     | <b>162.06</b> | <b>29.93</b> | <b>10.18</b> | <b>38.41</b> | <b>17.11</b> | <b>76.16</b>  | <b>46.37</b> | <b>84.93</b>  | <b>30.05</b> | <b>17.92</b> | <b>57.97</b> | <b>64.45</b>  | <b>33.66</b>  |
| <b>CPI(e/o)</b>     |                                                |     | <b>3.75</b>   | <b>5.06</b>  | <b>3.71</b>  | <b>5.06</b>  | <b>4.51</b>  | <b>6.00</b>   | <b>6.26</b>  | <b>5.47</b>   | <b>4.57</b>  | <b>6.36</b>  | <b>5.27</b>  | <b>5.06</b>   | <b>4.98</b>   |

### Wax inputs

|       |  |  |      |       |       |       |       |       |       |       |       |       |       |       |       |
|-------|--|--|------|-------|-------|-------|-------|-------|-------|-------|-------|-------|-------|-------|-------|
| Total |  |  | 9.50 | 6.25  | 2.96  | 18.97 | 6.58  | 34.15 | 27.10 | 35.11 | 11.99 | 13.98 | 24.80 | 29.19 | 23.11 |
| %     |  |  | 5.9% | 20.9% | 29.0% | 49.4% | 38.4% | 44.8% | 58.4% | 41.3% | 39.9% | 78.0% | 42.8% | 45.3% | 68.6% |

### Algal inputs

|                     |  |  |        |       |       |       |       |       |       |       |       |       |       |       |       |
|---------------------|--|--|--------|-------|-------|-------|-------|-------|-------|-------|-------|-------|-------|-------|-------|
| Total               |  |  | 118.44 | 19.73 | 7.06  | 16.10 | 11.43 | 36.13 | 18.89 | 43.69 | 20.66 | 10.50 | 33.92 | 35.62 | 16.92 |
| %                   |  |  | 73.1%  | 65.9% | 69.4% | 41.9% | 66.8% | 47.4% | 40.7% | 51.4% | 68.8% | 58.6% | 58.5% | 55.3% | 50.3% |
| Terristrial/Aquatic |  |  | 0.08   | 0.32  | 0.42  | 1.18  | 0.58  | 0.95  | 1.43  | 0.80  | 0.58  | 1.33  | 0.73  | 0.82  | 1.37  |

### Microbal inputs

|       |  |  |       |       |       |       |       |       |       |       |       |       |       |       |       |
|-------|--|--|-------|-------|-------|-------|-------|-------|-------|-------|-------|-------|-------|-------|-------|
| Total |  |  | 28.98 | 3.88  | 1.90  | 5.67  | 2.64  | 9.42  | 5.13  | 10.56 | 4.37  | 2.07  | 7.65  | 6.70  | 3.84  |
| %     |  |  | 17.9% | 13.0% | 18.6% | 14.8% | 15.5% | 12.4% | 11.1% | 12.4% | 14.5% | 11.5% | 13.2% | 10.4% | 11.4% |

### Plasticizers

|                            |                                                |     |       |      |      |      |      |       |      |       |      |      |      |      |      |
|----------------------------|------------------------------------------------|-----|-------|------|------|------|------|-------|------|-------|------|------|------|------|------|
| Diethyl phthalate          | C <sub>12</sub> H <sub>14</sub> O <sub>4</sub> | 222 | 12.0  | 3.7  | 1.2  | 0.7  | 1.2  | 7.4   | 2.0  | 6.4   | 1.2  | 4.0  | 5.5  | 2.4  | 5.3  |
| Di-isobutyl phthalate      | C <sub>16</sub> H <sub>22</sub> O <sub>4</sub> | 278 | 100.7 | 16.8 | 7.1  | 7.3  | 9.1  | 32.0  | 9.8  | 49.9  | 8.0  | 10.4 | 12.7 | 14.4 | 19.3 |
| Dibutyl phthalate          | C <sub>16</sub> H <sub>22</sub> O <sub>4</sub> | 278 | 178.7 | 40.7 | 12.3 | 10.6 | 17.2 | 79.8  | 13.2 | 170.1 | 12.3 | 33.2 | 50.4 | 23.7 | 41.6 |
| Di(2-ethylhexyl) phthalate | C <sub>24</sub> H <sub>38</sub> O <sub>4</sub> | 390 | 20.9  | 3.1  | 1.0  | 0.3  | 1.1  | 15.6  | 3.1  | 8.9   | 1.2  | 2.0  | 2.1  | 2.9  | 2.3  |
| Total                      |                                                |     | 312.4 | 64.3 | 21.7 | 19.0 | 28.6 | 134.8 | 28.0 | 235.2 | 22.8 | 49.6 | 70.7 | 43.4 | 68.6 |

### Station #

| Compound    | Composition                          | M.W. | 131 | 134  | 139  | 151  | 155  | 168  | 173  | 185  | 186  | 193 | 199 |
|-------------|--------------------------------------|------|-----|------|------|------|------|------|------|------|------|-----|-----|
| n-Alkanes   |                                      |      |     |      |      |      |      |      |      |      |      |     |     |
| Tetradecane | C <sub>14</sub> H <sub>30</sub>      | 198  | 0.1 | 0.1  | 0.2  | 0.5  | 0.3  | 0.0  | 0.2  | 0.1  | 0.2  | 0.3 | 0.2 |
| Pentadecane | C <sub>15</sub> H <sub>32</sub>      | 212  | 0.3 | 1.1  | 0.7  | 1.0  | 0.9  | 0.3  | 0.5  | 0.5  | 1.0  | 0.7 | 0.6 |
| Hexadecane  | C <sub>16</sub> H <sub>34</sub>      | 226  | 4.5 | 10.0 | 9.9  | 10.3 | 12.4 | 8.0  | 7.6  | 7.2  | 15.9 | 6.6 | 6.6 |
| Heptadecane | C <sub>17</sub> H <sub>36</sub>      | 240  | 2.1 | 5.2  | 3.9  | 4.1  | 6.5  | 4.0  | 4.0  | 3.6  | 7.2  | 2.8 | 3.4 |
| Pristane    | C <sub>19</sub> H <sub>40</sub> (Pr) | 268  | 0.1 | 0.2  | 0.1  | 0.1  | 0.2  | 0.2  | 0.4  | 0.2  | 0.7  | 0.2 | 0.3 |
| Octadecane  | C <sub>18</sub> H <sub>38</sub>      | 256  | 6.5 | 15.5 | 13.6 | 10.7 | 17.1 | 14.4 | 11.4 | 10.1 | 20.4 | 7.1 | 8.8 |
| Phytanes    | C <sub>20</sub> H <sub>42</sub> (Ph) | 282  | 0.7 | 1.4  | 1.2  | 0.8  | 1.3  | 1.1  | 1.2  | 0.8  | 2.1  | 0.6 | 1.2 |
| Nonadecane  | C <sub>19</sub> H <sub>40</sub>      | 268  | 3.0 | 4.0  | 3.2  | 0.7  | 4.1  | 3.5  | 3.0  | 2.9  | 5.4  | 2.0 | 2.9 |
| Eicosane    | C <sub>20</sub> H <sub>42</sub>      | 282  | 5.8 | 14.1 | 12.1 | 9.6  | 15.6 | 13.5 | 10.2 | 9.5  | 16.9 | 6.0 | 7.8 |
| Heneicosane | C <sub>21</sub> H <sub>44</sub>      | 296  | 0.8 | 6.4  | 0.4  | 0.1  | 1.4  | 8.0  | 0.3  | 0.3  | 2.1  | 0.1 | 0.6 |
| Docosane    | C <sub>22</sub> H <sub>46</sub>      | 310  | 3.0 | 3.0  | 2.5  | 2.3  | 3.8  | 2.7  | 2.2  | 2.2  | 3.9  | 1.4 | 1.9 |
| Tricosane   | C <sub>23</sub> H <sub>48</sub>      | 324  | 1.9 | 4.7  | 4.4  | 2.9  | 4.2  | 5.1  | 3.8  | 1.8  | 5.8  | 1.4 | 1.8 |
| Tetracosane | C <sub>24</sub> H <sub>50</sub>      | 338  | 1.5 | 3.2  | 2.4  | 2.3  | 3.5  | 2.8  | 2.2  | 2.0  | 3.6  | 1.2 | 1.6 |



|                                      |                                 |     |             |             |             |             |             |             |             |             |             |             |             |
|--------------------------------------|---------------------------------|-----|-------------|-------------|-------------|-------------|-------------|-------------|-------------|-------------|-------------|-------------|-------------|
| 17a(H),21b(H)-22S-Bishomohopane      | C <sub>32</sub> H <sub>56</sub> | 440 | 0.01        | 0.19        | T           | 0.00        | 0.04        | 0.00        | 0.00        | 0.01        | T           | T           | T           |
| 17a(H),21b(H)-22R-Bishomohopane      | C <sub>32</sub> H <sub>56</sub> | 440 | T           | 0.14        | T           | 0.00        | 0.02        | 0.00        | 0.00        | 0.01        | T           | T           | T           |
| 17a(H),21b(H)-22S-Trishomohopane     | C <sub>33</sub> H <sub>58</sub> | 454 | T           | T           | T           | T           | 0.01        | T           | T           | T           | T           | T           | T           |
| 17a(H),21b(H)-22R-Trishomohopane     | C <sub>33</sub> H <sub>58</sub> | 454 | T           | T           | T           | T           | T           | T           | T           | T           | T           | T           | T           |
| 17a(H),21b(H)-22S-Tetrakishomohopane | C <sub>34</sub> H <sub>60</sub> | 468 | T           | T           | T           | T           | T           | T           | T           | T           | T           | T           | T           |
| 17a(H),21b(H)-22R-Tetrakishomohopane | C <sub>34</sub> H <sub>60</sub> | 468 | T           | T           | T           | T           | T           | T           | T           | T           | T           | T           | T           |
| 17a(H),21b(H)-22S-Pentakishomohopane | C <sub>35</sub> H <sub>62</sub> | 482 | T           | T           | T           | T           | T           | T           | T           | T           | T           | T           | T           |
| 17a(H),21b(H)-22R-Pentakishomohopane | C <sub>35</sub> H <sub>62</sub> | 482 | T           | T           | T           | T           | T           | T           | T           | T           | T           | T           | T           |
| <b>Total</b>                         |                                 |     | <b>0.07</b> | <b>2.02</b> | <b>0.00</b> | <b>0.37</b> | <b>0.73</b> | <b>0.12</b> | <b>0.01</b> | <b>0.24</b> | <b>0.00</b> | <b>0.00</b> | <b>0.00</b> |
| C <sub>31</sub> S/(R+S)              |                                 |     | 0.58        | 0.49        | ND          | 0.65        | 0.66        | 0.69        | 0.53        | 0.71        | ND          | ND          | ND          |
| C <sub>32</sub> S/(R+S)              |                                 |     | ND          | 0.57        | ND          | ND          | 0.68        | ND          | ND          | 0.54        | ND          | ND          | ND          |

#### Steranes

|                                   |                                 |     |   |   |   |   |   |   |   |   |   |   |   |
|-----------------------------------|---------------------------------|-----|---|---|---|---|---|---|---|---|---|---|---|
| 13b,17a-20S-Cholestane Diasterane | C <sub>27</sub> H <sub>48</sub> | 372 | T | T | T | T | T | T | T | T | T | T | T |
| 13b,17a-20R-Cholestane Diasterane | C <sub>27</sub> H <sub>48</sub> | 372 | T | T | T | T | T | T | T | T | T | T | T |
| 13a,17b-20S-Cholestane Diasterane | C <sub>27</sub> H <sub>48</sub> | 372 | T | T | T | T | T | T | T | T | T | T | T |
| 13a,17b-20R-Cholestane Diasterane | C <sub>27</sub> H <sub>48</sub> | 372 | T | T | T | T | T | T | T | T | T | T | T |
| 14a,17ba-20S-Cholestane           | C <sub>27</sub> H <sub>48</sub> | 372 | T | T | T | T | T | T | T | T | T | T | T |
| 14b,17b-20R-Cholestane            | C <sub>27</sub> H <sub>48</sub> | 372 | T | T | T | T | T | T | T | T | T | T | T |
| 14b,17b-20S-Cholestane            | C <sub>27</sub> H <sub>48</sub> | 372 | T | T | T | T | T | T | T | T | T | T | T |
| 14a,17ba-20R-Cholestane           | C <sub>27</sub> H <sub>48</sub> | 372 | T | T | T | T | T | T | T | T | T | T | T |
| 14a,17ba-20S-Ergostane            | C <sub>28</sub> H <sub>50</sub> | 386 | T | T | T | T | T | T | T | T | T | T | T |
| 14b,17b-20R-Ergostane             | C <sub>28</sub> H <sub>50</sub> | 386 | T | T | T | T | T | T | T | T | T | T | T |
| 14b,17b-20S-Ergostane             | C <sub>28</sub> H <sub>50</sub> | 386 | T | T | T | T | T | T | T | T | T | T | T |
| 14a,17ba-20R-Ergostane            | C <sub>28</sub> H <sub>50</sub> | 386 | T | T | T | T | T | T | T | T | T | T | T |
| 14a,17ba-20S-Stigmastane          | C <sub>29</sub> H <sub>52</sub> | 400 | T | T | T | T | T | T | T | T | T | T | T |
| 14b,17b-20R-Stigmastane           | C <sub>29</sub> H <sub>52</sub> | 400 | T | T | T | T | T | T | T | T | T | T | T |
| 14b,17b-20S-Stigmastane           | C <sub>29</sub> H <sub>52</sub> | 400 | T | T | T | T | T | T | T | T | T | T | T |
| 14a,17ba-20R-Stigmastane          | C <sub>29</sub> H <sub>52</sub> | 400 | T | T | T | T | T | T | T | T | T | T | T |
| <b>Total</b>                      |                                 |     |   |   |   |   |   |   |   |   |   |   |   |

#### PAHs

|                      |                                 |     |            |            |            |             |             |            |            |            |             |             |            |
|----------------------|---------------------------------|-----|------------|------------|------------|-------------|-------------|------------|------------|------------|-------------|-------------|------------|
| Phenanthrene         | C <sub>14</sub> H <sub>10</sub> | 178 | 0.5        | 3.2        | 2.4        | 2.5         | 4.8         | 1.8        | 3.8        | 1.0        | 4.9         | 11.8        | 1.8        |
| Anthracene           | C <sub>14</sub> H <sub>10</sub> | 178 | 0.4        | 6.0        | 2.5        | 3.1         | 5.9         | 2.0        | 3.5        | 1.6        | 7.6         | 11.3        | 1.9        |
| Benzo[k]fluoranthene | C <sub>20</sub> H <sub>12</sub> | 252 | 0.2        | 0.2        | 0.2        | 3.6         | 0.4         | 0.1        | 0.1        | 0.2        | 0.2         | 0.1         | 0.1        |
| Benzo[b]fluoranthene | C <sub>20</sub> H <sub>12</sub> | 252 | 0.2        | 0.1        | 0.1        | 3.1         | 0.2         | 0.2        | 0.1        | 0.0        | 0.1         | 0.0         | 0.0        |
| <b>Total</b>         |                                 |     | <b>1.3</b> | <b>9.4</b> | <b>5.3</b> | <b>12.2</b> | <b>11.4</b> | <b>4.1</b> | <b>7.5</b> | <b>2.9</b> | <b>12.7</b> | <b>23.2</b> | <b>3.9</b> |

|               |     |     |     |     |     |     |     |     |     |     |     |
|---------------|-----|-----|-----|-----|-----|-----|-----|-----|-----|-----|-----|
| Ant/(Ant+Phe) | 0.4 | 0.7 | 0.5 | 0.6 | 0.6 | 0.5 | 0.5 | 0.6 | 0.6 | 0.5 | 0.5 |
|---------------|-----|-----|-----|-----|-----|-----|-----|-----|-----|-----|-----|

Methyl alkanoates

|                       |                                                |     |       |       |       |       |       |       |       |       |       |      |       |
|-----------------------|------------------------------------------------|-----|-------|-------|-------|-------|-------|-------|-------|-------|-------|------|-------|
| Methyl octanoate      | C <sub>9</sub> H <sub>18</sub> O <sub>2</sub>  | 158 | 0.00  | 0.05  | 0.02  | 0.01  | 0.02  | 0.13  | 0.12  | 0.02  | 0.06  | 0.00 | 0.00  |
| Methyl nonanoate      | C <sub>10</sub> H <sub>20</sub> O <sub>2</sub> | 172 | 0.02  | 0.10  | 0.04  | 0.02  | 0.03  | 0.11  | 0.10  | 0.06  | 0.07  | 0.01 | 0.01  |
| Methyl decanoate      | C <sub>11</sub> H <sub>22</sub> O <sub>2</sub> | 186 | 0.01  | 0.03  | 0.01  | 0.03  | 0.03  | 0.03  | 0.04  | 0.03  | 0.04  | 0.01 | 0.01  |
| Methyl undecanoate    | C <sub>12</sub> H <sub>24</sub> O <sub>2</sub> | 200 | 0.01  | 0.05  | 0.03  | 0.03  | 0.05  | 0.04  | 0.06  | 0.04  | 0.05  | 0.02 | 0.03  |
| Methyl dodecanoate    | C <sub>13</sub> H <sub>26</sub> O <sub>2</sub> | 214 | 0.07  | 0.10  | 0.12  | 0.11  | 0.15  | 0.12  | 0.16  | 0.13  | 0.18  | 0.11 | 0.10  |
| Methyl tridecanoate   | C <sub>14</sub> H <sub>28</sub> O <sub>2</sub> | 228 | 0.12  | 0.44  | 0.17  | 0.06  | 0.14  | 0.19  | 0.22  | 0.09  | 0.21  | 0.07 | 0.07  |
| Methyl tetradecanoate | C <sub>15</sub> H <sub>30</sub> O <sub>2</sub> | 242 | 0.29  | 0.98  | 0.64  | 0.47  | 0.86  | 0.62  | 0.66  | 0.47  | 1.15  | 0.28 | 0.40  |
| Methyl pentadecanoate | C <sub>16</sub> H <sub>32</sub> O <sub>2</sub> | 256 | 0.14  | 0.47  | 0.32  | 0.19  | 0.39  | 0.28  | 0.33  | 0.19  | 0.57  | 0.12 | 0.20  |
| Methyl hexadecenoate  | C <sub>17</sub> H <sub>32</sub> O <sub>2</sub> | 268 | 0.00  | 0.03  | 0.00  | 0.01  | 0.01  | 0.00  | 0.00  | 0.00  | 0.01  | 0.02 | 0.01  |
| Methyl hexadecanoate  | C <sub>17</sub> H <sub>34</sub> O <sub>2</sub> | 270 | 7.49  | 17.56 | 11.60 | 8.29  | 17.52 | 10.15 | 9.64  | 8.39  | 22.91 | 5.07 | 7.23  |
| Methyl heptadecenoate | C <sub>18</sub> H <sub>34</sub> O <sub>2</sub> | 282 | 0.08  | 0.22  | 0.18  | 0.11  | 0.26  | 0.21  | 0.17  | 0.17  | 0.21  | 0.05 | 0.12  |
| Methyl octadecanoate  | C <sub>19</sub> H <sub>36</sub> O <sub>2</sub> | 296 | 0.00  | 0.01  | 0.00  | 0.01  | 0.00  | 0.01  | 0.00  | 0.01  | 0.01  | 0.01 | 0.00  |
| Methyl octadecenoate  | C <sub>19</sub> H <sub>38</sub> O <sub>2</sub> | 298 | 2.22  | 7.11  | 6.54  | 2.60  | 6.01  | 9.27  | 14.97 | 3.53  | 10.23 | 2.73 | 3.61  |
| Methyl nonadecanoate  | C <sub>20</sub> H <sub>40</sub> O <sub>2</sub> | 312 | 0.05  | 0.16  | 0.05  | 0.08  | 0.11  | 0.15  | 0.11  | 0.06  | 0.07  | 0.03 | 0.05  |
| Total                 |                                                |     | 10.47 | 27.14 | 19.64 | 11.96 | 25.57 | 21.31 | 26.58 | 13.19 | 35.76 | 8.54 | 11.85 |

CPI(e/o)

Total FA

|                 |                                                |     |      |       |      |      |       |      |      |       |       |       |      |
|-----------------|------------------------------------------------|-----|------|-------|------|------|-------|------|------|-------|-------|-------|------|
| Pentanoic acid  | C <sub>5</sub> H <sub>10</sub> O <sub>2</sub>  | 102 | 1.02 | 0.98  | 0.17 | 0.18 | 1.57  | 0.01 | 0.00 | 0.47  | 0.67  | 0.76  | 0.27 |
| Hexanoic acid   | C <sub>6</sub> H <sub>12</sub> O <sub>2</sub>  | 116 | 2.57 | 5.23  | 0.96 | 0.63 | 4.73  | 0.02 | 0.00 | 2.53  | 7.05  | 2.85  | 1.96 |
| Heptanoic acid  | C <sub>7</sub> H <sub>14</sub> O <sub>2</sub>  | 130 | 2.35 | 5.15  | 0.86 | 0.62 | 5.11  | 0.02 | 0.00 | 2.81  | 2.05  | 2.86  | 2.21 |
| Octanoic acid   | C <sub>8</sub> H <sub>16</sub> O <sub>2</sub>  | 144 | 6.39 | 14.32 | 2.61 | 1.97 | 12.49 | 0.11 | 0.00 | 7.26  | 7.10  | 8.63  | 6.31 |
| Nonanoic acid   | C <sub>9</sub> H <sub>18</sub> O <sub>2</sub>  | 158 | 9.72 | 19.32 | 3.11 | 3.53 | 20.07 | 0.36 | 0.12 | 10.66 | 4.14  | 15.00 | 9.29 |
| Dodanoic acid   | C <sub>10</sub> H <sub>20</sub> O <sub>2</sub> | 172 | 3.39 | 6.71  | 0.96 | 1.17 | 6.80  | 0.22 | 0.10 | 3.68  | 8.40  | 5.71  | 3.26 |
| Undecanoic acid | C <sub>11</sub> H <sub>22</sub> O <sub>2</sub> | 186 | 1.98 | 3.89  | 0.54 | 0.77 | 4.04  | 0.06 | 0.04 | 2.05  | 3.75  | 3.67  | 1.95 |
| Dodecanoic acid | C <sub>12</sub> H <sub>24</sub> O <sub>2</sub> | 200 | 3.26 | 6.71  | 0.78 | 1.01 | 6.44  | 0.12 | 0.06 | 3.35  | 10.04 | 6.00  | 3.21 |

|                     |                                                |     |               |               |              |              |               |              |              |               |               |               |               |
|---------------------|------------------------------------------------|-----|---------------|---------------|--------------|--------------|---------------|--------------|--------------|---------------|---------------|---------------|---------------|
| Tridecanoic acid    | C <sub>13</sub> H <sub>26</sub> O <sub>2</sub> | 214 | 1.78          | 3.50          | 0.66         | 0.68         | 3.75          | 0.19         | 0.16         | 1.92          | 1.25          | 3.44          | 1.81          |
| Tetradecanoic acid  | C <sub>14</sub> H <sub>28</sub> O <sub>2</sub> | 228 | 5.95          | 11.94         | 2.06         | 1.80         | 14.16         | 0.31         | 0.22         | 6.29          | 3.89          | 11.69         | 5.79          |
| Pentadecanoic acid  | C <sub>15</sub> H <sub>30</sub> O <sub>2</sub> | 242 | 4.04          | 7.86          | 1.23         | 1.42         | 8.36          | 0.67         | 0.66         | 4.33          | 3.67          | 7.56          | 1.39          |
| Hexadecenoic acid   | C <sub>16</sub> H <sub>30</sub> O <sub>2</sub> | 254 | 0.15          | 0.59          | 0.33         | 0.25         | 0.67          | 0.29         | 0.33         | 0.29          | 4.08          | 0.14          | 0.23          |
| Hexadecanoic acid   | C <sub>16</sub> H <sub>32</sub> O <sub>2</sub> | 256 | 49.32         | 84.55         | 14.15        | 15.51        | 86.07         | 1.35         | 0.00         | 52.41         | 1.09          | 83.86         | 48.94         |
| Heptadecanoic acid  | C <sub>17</sub> H <sub>34</sub> O <sub>2</sub> | 270 | 8.82          | 20.21         | 11.74        | 8.55         | 20.04         | 10.16        | 9.64         | 9.72          | 24.46         | 7.65          | 8.53          |
| Octadecenoic acid   | C <sub>18</sub> H <sub>34</sub> O <sub>2</sub> | 282 | 0.11          | 0.29          | 0.18         | 0.11         | 0.28          | 0.21         | 0.17         | 0.18          | 0.32          | 0.07          | 0.16          |
| Octadecanoic acid   | C <sub>18</sub> H <sub>36</sub> O <sub>2</sub> | 284 | 34.42         | 56.60         | 5.74         | 7.40         | 51.72         | 0.54         | 0.00         | 33.53         | 0.79          | 56.80         | 30.05         |
| Nonadecanoic acid   | C <sub>19</sub> H <sub>38</sub> O <sub>2</sub> | 298 | 2.41          | 8.28          | 9.07         | 2.72         | 6.19          | 9.30         | 14.97        | 3.75          | 16.88         | 2.93          | 4.16          |
| Eicosanoic acid     | C <sub>20</sub> H <sub>40</sub> O <sub>2</sub> | 312 | 0.46          | 0.56          | 0.72         | 0.16         | 0.38          | 0.15         | 0.11         | 0.31          | 3.72          | 0.10          | 0.22          |
| Heneicosanoic acid  | C <sub>21</sub> H <sub>42</sub> O <sub>2</sub> | 326 | 10.47         | 27.14         | 19.64        | 11.96        | 25.57         | 21.31        | 26.58        | 13.19         | 35.76         | 8.54          | 11.85         |
| <b>Total</b>        |                                                |     | <b>148.61</b> | <b>283.81</b> | <b>75.50</b> | <b>60.42</b> | <b>278.43</b> | <b>45.38</b> | <b>53.16</b> | <b>158.73</b> | <b>139.13</b> | <b>228.25</b> | <b>141.58</b> |
| <b>CPI(e/o)</b>     |                                                |     | <b>2.48</b>   | <b>1.94</b>   | <b>0.60</b>  | <b>0.97</b>  | <b>1.93</b>   | <b>0.07</b>  | <b>0.01</b>  | <b>2.24</b>   | <b>0.45</b>   | <b>3.35</b>   | <b>2.41</b>   |
|                     |                                                |     |               |               |              |              |               |              |              |               |               |               |               |
| <b>Wax FA</b>       |                                                |     | <b>0.00</b>   | <b>0.00</b>   | <b>0.00</b>  | <b>0.00</b>  | <b>0.00</b>   | <b>0.00</b>  | <b>0.00</b>  | <b>0.00</b>   | <b>0.00</b>   | <b>0.00</b>   | <b>0.00</b>   |
|                     |                                                |     |               |               |              |              |               |              |              |               |               |               |               |
| <b>Algal FA</b>     |                                                |     |               |               |              |              |               |              |              |               |               |               |               |
| <b>Total</b>        |                                                |     | <b>106.0</b>  | <b>187.5</b>  | <b>28.5</b>  | <b>30.0</b>  | <b>183.7</b>  | <b>3.3</b>   | <b>1.0</b>   | <b>109.8</b>  | <b>46.5</b>   | <b>175.9</b>  | <b>100.1</b>  |
| <b>%</b>            |                                                |     | <b>71.3%</b>  | <b>66.1%</b>  | <b>37.7%</b> | <b>49.6%</b> | <b>66.0%</b>  | <b>7.3%</b>  | <b>1.9%</b>  | <b>69.2%</b>  | <b>33.4%</b>  | <b>77.0%</b>  | <b>70.7%</b>  |
|                     |                                                |     |               |               |              |              |               |              |              |               |               |               |               |
| <b>Microbial FA</b> |                                                |     |               |               |              |              |               |              |              |               |               |               |               |
| <b>Total</b>        |                                                |     | <b>28.75</b>  | <b>63.06</b>  | <b>26.34</b> | <b>17.66</b> | <b>62.45</b>  | <b>20.73</b> | <b>25.59</b> | <b>32.42</b>  | <b>54.16</b>  | <b>40.24</b>  | <b>27.13</b>  |
| <b>%</b>            |                                                |     | 19.3%         | 22.2%         | 34.9%        | 29.2%        | 22.4%         | 45.7%        | 48.1%        | 20.4%         | 38.9%         | 17.6%         | 19.2%         |
|                     |                                                |     |               |               |              |              |               |              |              |               |               |               |               |
| <b>n-Alkanols</b>   |                                                |     |               |               |              |              |               |              |              |               |               |               |               |
| Undecanol           | C <sub>11</sub> H <sub>24</sub> O              | 172 | 0.24          | 1.10          | 0.35         | 0.81         | 0.70          | 0.10         | 0.15         | 0.62          | 0.67          | 0.21          | 0.22          |
| Dodecanol           | C <sub>12</sub> H <sub>26</sub> O              | 186 | 2.63          | 9.46          | 10.01        | 8.03         | 10.82         | 2.55         | 3.23         | 4.64          | 7.05          | 4.09          | 4.57          |
| Tridecanol          | C <sub>13</sub> H <sub>28</sub> O              | 200 | 0.70          | 2.03          | 1.94         | 1.67         | 1.87          | 0.83         | 0.97         | 1.26          | 2.05          | 0.90          | 0.90          |
| Tetradecanol        | C <sub>14</sub> H <sub>30</sub> O              | 214 | 2.14          | 6.38          | 7.93         | 5.81         | 7.24          | 2.43         | 4.04         | 3.68          | 7.10          | 2.97          | 3.55          |
| Pentadecanol        | C <sub>15</sub> H <sub>32</sub> O              | 228 | 1.33          | 3.18          | 3.24         | 3.64         | 6.47          | 1.31         | 2.46         | 1.93          | 4.08          | 1.44          | 2.05          |
| Hexadecanol         | C <sub>16</sub> H <sub>34</sub> O              | 242 | 3.57          | 7.94          | 7.77         | 4.56         | 12.32         | 2.16         | 6.22         | 4.28          | 8.33          | 3.73          | 4.74          |
| Heptadecanol        | C <sub>17</sub> H <sub>36</sub> O              | 256 | 0.91          | 2.35          | 2.53         | 1.43         | 4.06          | 0.80         | 2.68         | 1.46          | 3.71          | 1.00          | 1.62          |
| Octadecanol         | C <sub>18</sub> H <sub>38</sub> O              | 270 | 6.04          | 10.91         | 15.19        | 6.10         | 9.38          | 6.60         | 7.96         | 7.79          | 9.99          | 5.29          | 6.92          |
| Nonadecanol         | C <sub>19</sub> H <sub>40</sub> O              | 284 | 0.30          | 1.08          | 1.22         | 0.82         | 4.53          | 0.46         | 0.78         | 1.51          | 1.08          | 0.34          | 0.46          |
| Eicosanol           | C <sub>20</sub> H <sub>42</sub> O              | 298 | 0.89          | 4.21          | 3.71         | 1.15         | 1.46          | 0.73         | 2.00         | 1.24          | 3.68          | 0.94          | 1.85          |
| Heneicosanol        | C <sub>21</sub> H <sub>44</sub> O              | 312 | 0.18          | 2.57          | 0.65         | 0.47         | 0.25          | 0.26         | 0.41         | 1.98          | 2.52          | 0.18          | 0.23          |
| Docosanol           | C <sub>22</sub> H <sub>46</sub> O              | 326 | 4.13          | 2.51          | 3.06         | 1.02         | 8.87          | 4.87         | 9.07         | 5.76          | 3.51          | 4.22          | 7.97          |

|                            |                                                |     |              |              |              |              |              |              |              |              |              |              |              |
|----------------------------|------------------------------------------------|-----|--------------|--------------|--------------|--------------|--------------|--------------|--------------|--------------|--------------|--------------|--------------|
| Triacosanol                | C <sub>23</sub> H <sub>48</sub> O              | 340 | 0.21         | 1.17         | 1.18         | 2.58         | 0.78         | 0.26         | 0.47         | 0.29         | 1.08         | 0.33         | 0.45         |
| Tetracosanol               | C <sub>24</sub> H <sub>50</sub> O              | 354 | 0.46         | 11.78        | 6.37         | 4.67         | 19.90        | 2.27         | 3.10         | 0.87         | 1.55         | 0.33         | 4.95         |
| Pentacosanol               | C <sub>25</sub> H <sub>52</sub> O              | 368 | 0.01         | 0.11         | 0.12         | 0.10         | 0.15         | 0.03         | 0.08         | 0.03         | 0.11         | 0.05         | 0.03         |
| Hexacosanol                | C <sub>26</sub> H <sub>54</sub> O              | 382 | 0.15         | 0.82         | 0.84         | 0.68         | 0.53         | 0.17         | 0.61         | 0.25         | 0.78         | 0.26         | 0.31         |
| <b>Total</b>               |                                                |     | <b>23.87</b> | <b>67.60</b> | <b>66.13</b> | <b>43.54</b> | <b>89.36</b> | <b>25.83</b> | <b>44.22</b> | <b>37.60</b> | <b>57.30</b> | <b>26.28</b> | <b>40.82</b> |
| <b>CPI(e/o)</b>            |                                                |     | <b>5.16</b>  | <b>3.97</b>  | <b>4.88</b>  | <b>2.78</b>  | <b>3.75</b>  | <b>5.39</b>  | <b>4.53</b>  | <b>3.14</b>  | <b>2.74</b>  | <b>4.90</b>  | <b>5.85</b>  |
| <b>Wax inputs</b>          |                                                |     |              |              |              |              |              |              |              |              |              |              |              |
| <b>Total</b>               |                                                |     | <b>17.73</b> | <b>29.11</b> | <b>25.27</b> | <b>22.37</b> | <b>46.31</b> | <b>25.31</b> | <b>31.78</b> | <b>26.88</b> | <b>26.84</b> | <b>26.81</b> | <b>36.23</b> |
| %                          |                                                |     | 74.3%        | 43.1%        | 38.2%        | 51.4%        | 51.8%        | 98.0%        | 71.9%        | 71.5%        | 46.8%        | 102.0%       | 88.8%        |
| <b>Algal inputs</b>        |                                                |     |              |              |              |              |              |              |              |              |              |              |              |
| <b>Total</b>               |                                                |     | <b>15.26</b> | <b>38.90</b> | <b>44.61</b> | <b>25.64</b> | <b>41.22</b> | <b>14.47</b> | <b>23.45</b> | <b>21.63</b> | <b>36.15</b> | <b>17.01</b> | <b>21.63</b> |
| %                          |                                                |     | 63.9%        | 57.5%        | 67.5%        | 58.9%        | 46.1%        | 56.0%        | 53.0%        | 57.5%        | 63.1%        | 64.7%        | 53.0%        |
| Terristrial/Aquatic        |                                                |     | 1.16         | 0.75         | 0.57         | 0.87         | 1.12         | 1.75         | 1.35         | 1.24         | 0.74         | 1.58         | 1.68         |
| <b>Microbal inputs</b>     |                                                |     |              |              |              |              |              |              |              |              |              |              |              |
| <b>Total</b>               |                                                |     | <b>3.24</b>  | <b>8.64</b>  | <b>8.93</b>  | <b>7.57</b>  | <b>16.94</b> | <b>3.39</b>  | <b>6.89</b>  | <b>6.17</b>  | <b>10.92</b> | <b>3.69</b>  | <b>5.03</b>  |
| %                          |                                                |     | 13.6%        | 12.8%        | 13.5%        | 17.4%        | 19.0%        | 13.1%        | 15.6%        | 16.4%        | 19.1%        | 14.0%        | 12.3%        |
| <b>Plasticizers</b>        |                                                |     |              |              |              |              |              |              |              |              |              |              |              |
| Diethyl phthalate          | C <sub>12</sub> H <sub>14</sub> O <sub>4</sub> | 222 | 3.5          | 6.8          | 2.6          | 1.7          | 3.7          | 1.3          | 1.8          | 1.9          | 6.2          | 1.5          | 1.8          |
| Di-isobutyl phthalate      | C <sub>16</sub> H <sub>22</sub> O <sub>4</sub> | 278 | 9.7          | 20.9         | 13.5         | 11.7         | 23.9         | 12.2         | 11.6         | 11.5         | 24.9         | 8.4          | 14.0         |
| Dibutyl phthalate          | C <sub>16</sub> H <sub>22</sub> O <sub>4</sub> | 278 | 14.9         | 38.5         | 11.2         | 24.4         | 37.1         | 31.8         | 19.2         | 11.3         | 72.8         | 20.3         | 20.2         |
| Di(2-ethylhexyl) phthalate | C <sub>24</sub> H <sub>38</sub> O <sub>4</sub> | 390 | 1.1          | 1.9          | 2.8          | 2.9          | 1.8          | 1.4          | 1.4          | 1.0          | 4.3          | 1.6          | 1.4          |
| <b>Total</b>               |                                                |     | <b>29.1</b>  | <b>68.1</b>  | <b>30.0</b>  | <b>40.7</b>  | <b>66.5</b>  | <b>46.8</b>  | <b>34.1</b>  | <b>25.8</b>  | <b>108.1</b> | <b>31.9</b>  | <b>37.4</b>  |
